# Supplementary material for: New Cytotoxic Natural Products from the Red Sea Sponge Stylissa carteri
Source: PubMed Central journal article supplement (PMC7281077; doi:10.3390/md18050241), 2020-05-03
Supplement: marinedrugs-18-00241-s001.pdf [file marinedrugs-18-00241-s001.pdf]

## Supporting Information

# New Cytotoxic Natural Products from the Red Sea Sponge *Stylissa Carteri*

Reda F. A. Abdelhameed <sup>1,†</sup>, Eman S. Habib <sup>1,†</sup>, Nermeen A. Eltahawy <sup>1</sup>, Hashim A. Hassanean <sup>1</sup>, Amany K. Ibrahim <sup>1</sup>, Anber F. Mohammed <sup>2</sup>, Shaimaa Fayez <sup>3,4</sup>, Alaa M. Hayallah <sup>2,5</sup>, Koji Yamada <sup>6</sup>, Fathy A. Behery <sup>7,8</sup>, Mohammad M. Al-Sanea <sup>9</sup>, Sami I. Alzarea <sup>10</sup>, Gerhard Bringmann <sup>3</sup>, Safwat A. Ahmed <sup>1,\*</sup> and Usama Ramadan Abdelmohsen <sup>11,12,\*</sup>

<sup>1</sup> Department of Pharmacognosy, Faculty of Pharmacy, Suez Canal University, 41522 Ismailia, Egypt; [omarreda\\_70@yahoo.com](mailto:omarreda_70@yahoo.com) (R.F.A.A.); [emy\\_197@hotmail.com](mailto:emy_197@hotmail.com) (E.S.H.); [nermeenazmy25@gmail.com](mailto:nermeenazmy25@gmail.com) (N.A.E.); [hasanean2000@yahoo.com](mailto:hasanean2000@yahoo.com) (H.A.A.); [am\\_kamal66@yahoo.com](mailto:am_kamal66@yahoo.com) (A.K.I.)

<sup>2</sup> Department of Pharmaceutical Organic Chemistry, Faculty of Pharmacy, Assiut University, 71526 Assiut, Egypt; [anber\\_pharm\\_2006@yahoo.com](mailto:anber_pharm_2006@yahoo.com) (A.F.M.); [alaa\\_hayalah@yahoo.com](mailto:alaa_hayalah@yahoo.com) (A.M.H.)

<sup>3</sup> Institute of Organic Chemistry, University of Würzburg, Am Hubland, 97074 Würzburg, Germany; [shaimaa.seaf@uni-wuerzburg.de](mailto:shaimaa.seaf@uni-wuerzburg.de) (S.F.); [bringmann@chemie.uni-wuerzburg.de](mailto:bringmann@chemie.uni-wuerzburg.de) (G.B.)

<sup>4</sup> Department of Pharmacognosy, Faculty of Pharmacy, Ain-Shams University, 11566 Cairo, Egypt;

<sup>5</sup> Department of Pharmaceutical Chemistry, Faculty of Pharmacy, Deraya University, 61111 New Minia, Egypt;

<sup>6</sup> Graduate School of Biomedical Sciences, Nagasaki University, Bunkyo-machi 1-14, 852-8521 Nagasaki, Japan; [kyamada@nagasaki-u.ac.jp](mailto:kyamada@nagasaki-u.ac.jp)

<sup>7</sup> Department of Pharmacognosy, Faculty of Pharmacy, Mansoura University, Mansoura 35516, Egypt; [fathybehery@yahoo.com](mailto:fathybehery@yahoo.com)

<sup>8</sup> Department of Pharmaceutical Sciences, College of Pharmacy, Riyadh Elm University, 11681 Riyadh, Saudi Arabia.

<sup>9</sup> Department of Pharmaceutical Chemistry, College of Pharmacy, Jouf University, 72341 Aljouf, Saudi Arabia; [mohmah80@gmail.com](mailto:mohmah80@gmail.com)

<sup>10</sup> Department of Pharmacology, College of Pharmacy, Jouf University, 72341 Aljouf, Saudi Arabia; [samisz@ju.edu.sa](mailto:samisz@ju.edu.sa)

<sup>11</sup> Department of Pharmacognosy, Faculty of Pharmacy, Deraya University, 61111 New Minia, Egypt,

<sup>12</sup> Department of Pharmacognosy, Faculty of Pharmacy, Minia University, 61519 Minia, Egypt,

<sup>†</sup> Equal contributions: Eman S. Habib and Reda F.A. Abdelhameed as first author.

<sup>\*</sup> Correspondence: [usama.ramadan@mu.edu.eg](mailto:usama.ramadan@mu.edu.eg) (U.R.A.) and [safwat\\_aa@yahoo.com](mailto:safwat_aa@yahoo.com) (S.A.A)

## Table of Contents

|                                                                                                                                                   |    |
|---------------------------------------------------------------------------------------------------------------------------------------------------|----|
| <b>Figure S1:</b> HRMS of Compound <b>1</b> (+MS).....                                                                                            | 3  |
| <b>Figure S2:</b> <sup>1</sup> H-NMR spectrum of compound <b>1</b> in (C <sub>5</sub> D <sub>5</sub> N, 400 MHz).....                             | 4  |
| <b>Figure S3:</b> Partial expansions of the <sup>1</sup> H-NMR spectrum of compound <b>1</b> in (C <sub>5</sub> D <sub>5</sub> N, 400 MHz).....   | 5  |
| <b>Figure S4:</b> Partial expansions of the <sup>1</sup> H-NMR spectrum of compound <b>1</b> in (C <sub>5</sub> D <sub>5</sub> N, 400 MHz) .....  | 6  |
| <b>Figure S5:</b> <sup>13</sup> C-NMR spectrum of compound <b>1</b> in (C <sub>5</sub> D <sub>5</sub> N, 100 MHz).....                            | 7  |
| <b>Figure S6:</b> Partial expansion of the <sup>13</sup> C-NMR spectrum of compound <b>1</b> in (C <sub>5</sub> D <sub>5</sub> N, 100 MHz).....   | 8  |
| <b>Figure S7:</b> Partial expansion of the <sup>13</sup> C-NMR spectrum of compound <b>1</b> in (C <sub>5</sub> D <sub>5</sub> N, 100 MHz).....   | 9  |
| <b>Figure S8:</b> 2D-COSY spectrum of compound <b>1</b> in (C <sub>5</sub> D <sub>5</sub> N, 400 MHz).....                                        | 10 |
| <b>Figure S9:</b> 2D-HMQC spectrum of compound <b>1</b> in (C <sub>5</sub> D <sub>5</sub> N, 400 MHz).....                                        | 11 |
| <b>Figure S10:</b> 2D-HMBC spectrum of compound <b>1</b> in (C <sub>5</sub> D <sub>5</sub> N, 400 MHz).....                                       | 12 |
| <b>Figure S11:</b> HRMS of Compound <b>2</b> (+MS).....                                                                                           | 13 |
| <b>Figure S12:</b> <sup>1</sup> H-NMR spectrum of compound <b>2</b> in (C <sub>5</sub> D <sub>5</sub> N, 400 MHz).....                            | 14 |
| <b>Figure S13:</b> Partial expansions of the <sup>1</sup> H-NMR spectrum of compound <b>2</b> in (C <sub>5</sub> D <sub>5</sub> N, 400 MHz).....  | 15 |
| <b>Figure S14:</b> Partial expansions of the <sup>1</sup> H-NMR spectrum of compound <b>2</b> in (C <sub>5</sub> D <sub>5</sub> N, 400 MHz) ..... | 16 |
| <b>Figure S15:</b> <sup>13</sup> C-NMR spectrum of compound <b>2</b> in (C <sub>5</sub> D <sub>5</sub> N, 100 MHz).....                           | 17 |
| <b>Figure S16:</b> Partial expansion of the <sup>13</sup> C-NMR spectrum of compound <b>2</b> in (C <sub>5</sub> D <sub>5</sub> N, 100 MHz).....  | 18 |
| <b>Figure S17:</b> Partial expansion of the <sup>13</sup> C-NMR spectrum of compound <b>2</b> in (C <sub>5</sub> D <sub>5</sub> N, 100 MHz).....  | 19 |
| <b>Figure S18:</b> Partial expansion of the <sup>13</sup> C-NMR spectrum of compound <b>2</b> in (C <sub>5</sub> D <sub>5</sub> N, 100 MHz).....  | 20 |
| <b>Figure S19:</b> 2D-COSY spectrum of compound <b>2</b> in (C <sub>5</sub> D <sub>5</sub> N, 400 MHz).....                                       | 21 |
| <b>Figure S20:</b> 2D-HMQC spectrum of compound <b>2</b> in (C <sub>5</sub> D <sub>5</sub> N, 400 MHz).....                                       | 22 |
| <b>Figure S21:</b> 2D-HMBC spectrum of compound <b>2</b> in (C <sub>5</sub> D <sub>5</sub> N, 400 MHz).....                                       | 23 |

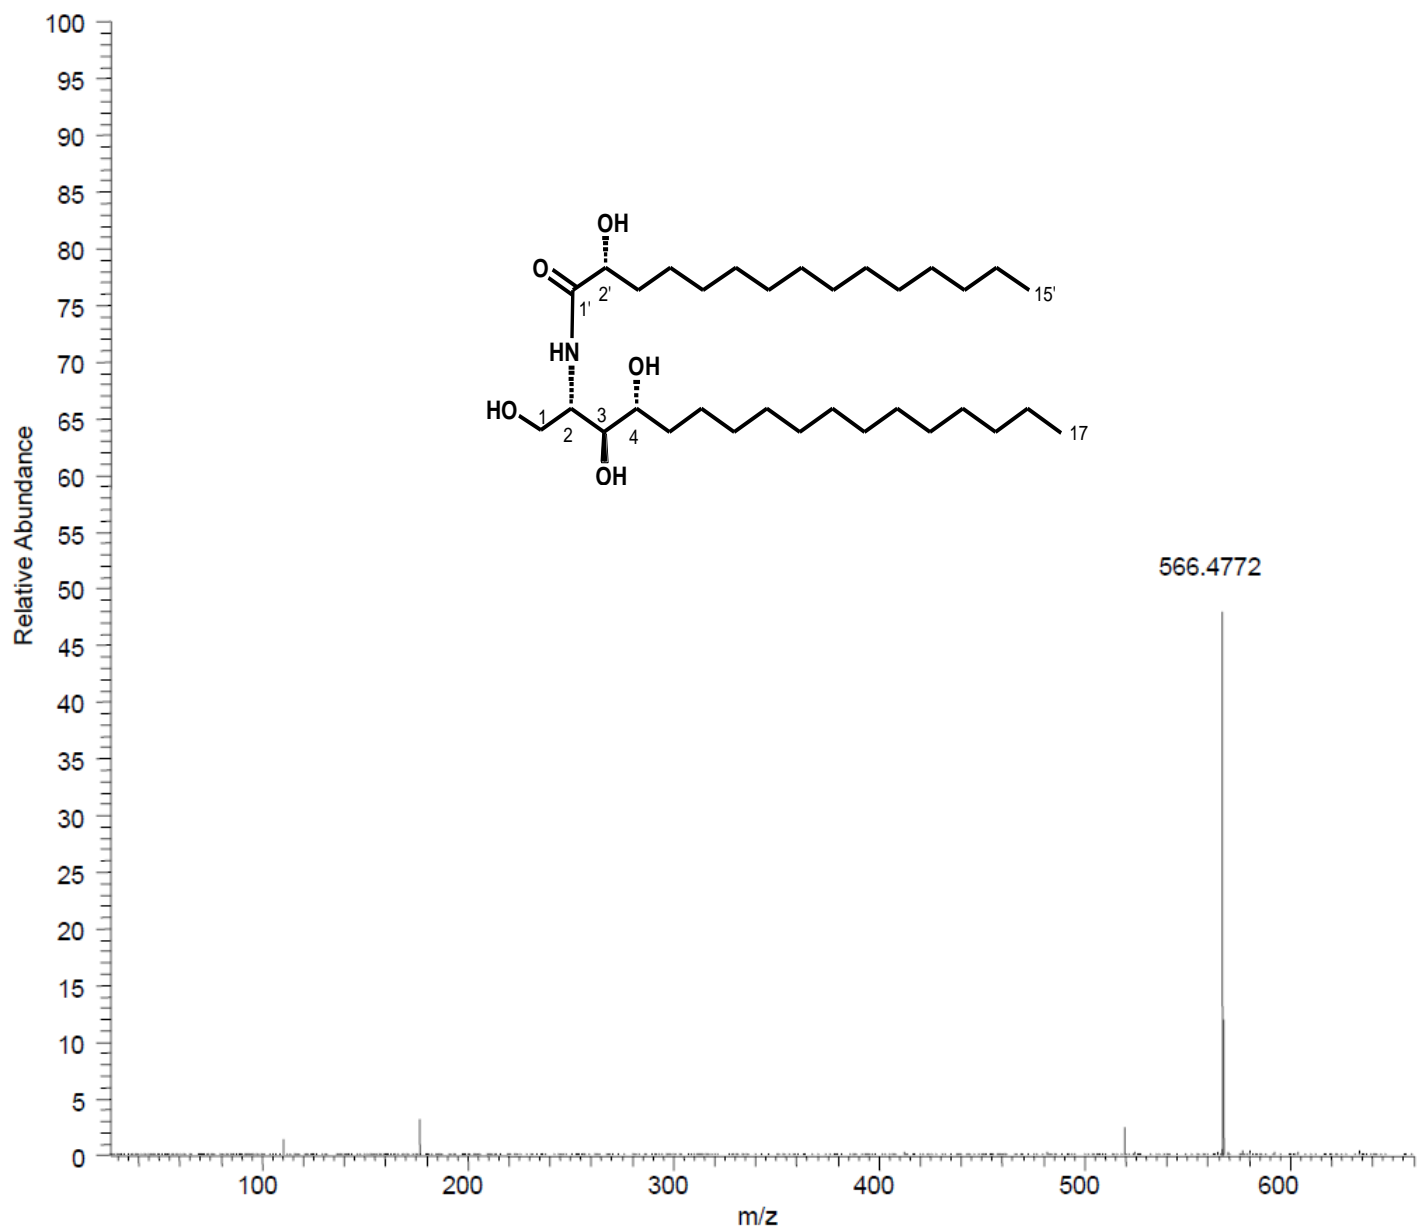

**Figure S1: HRMS of Compound 1 (+MS)**

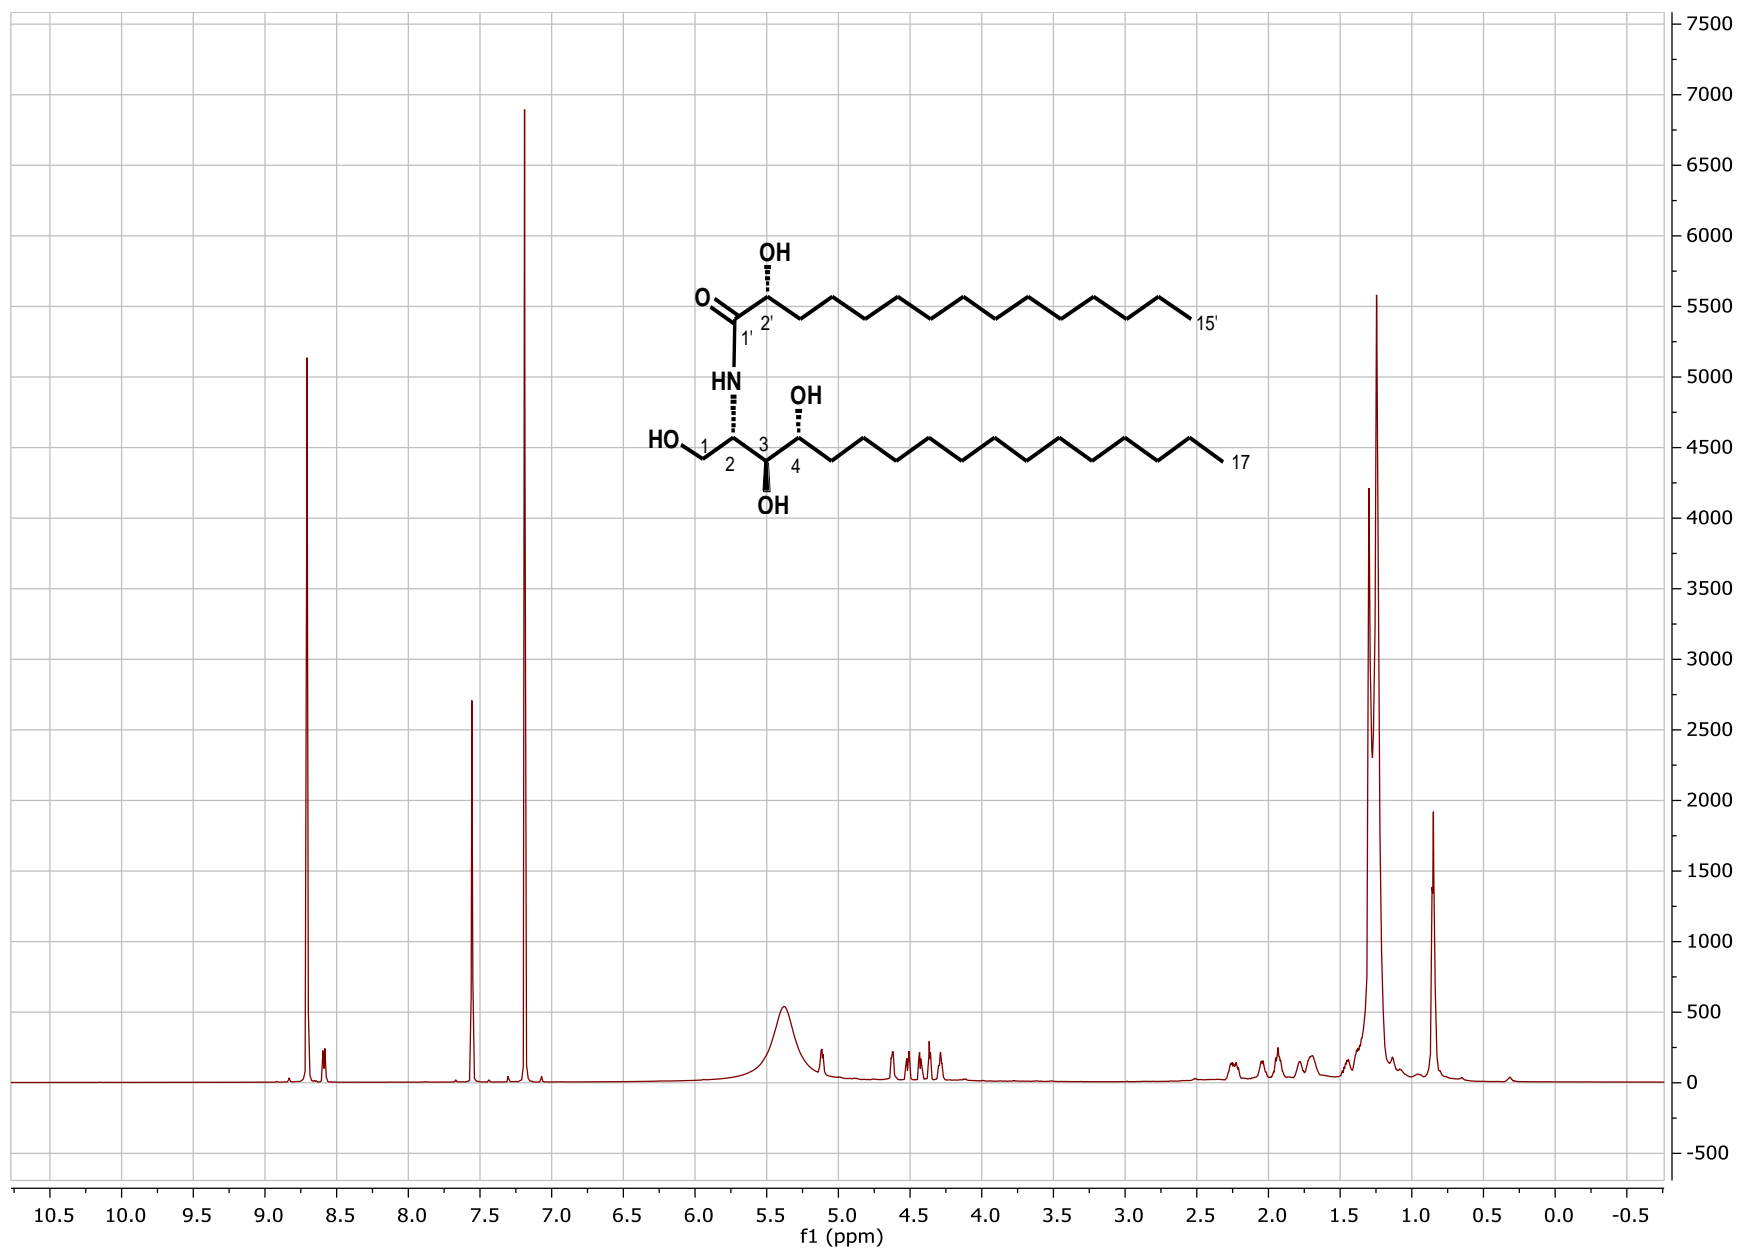

**Figure S2:** <sup>1</sup>H-NMR spectrum of compound **1** in (C<sub>5</sub>D<sub>5</sub>N, 400 MHz)

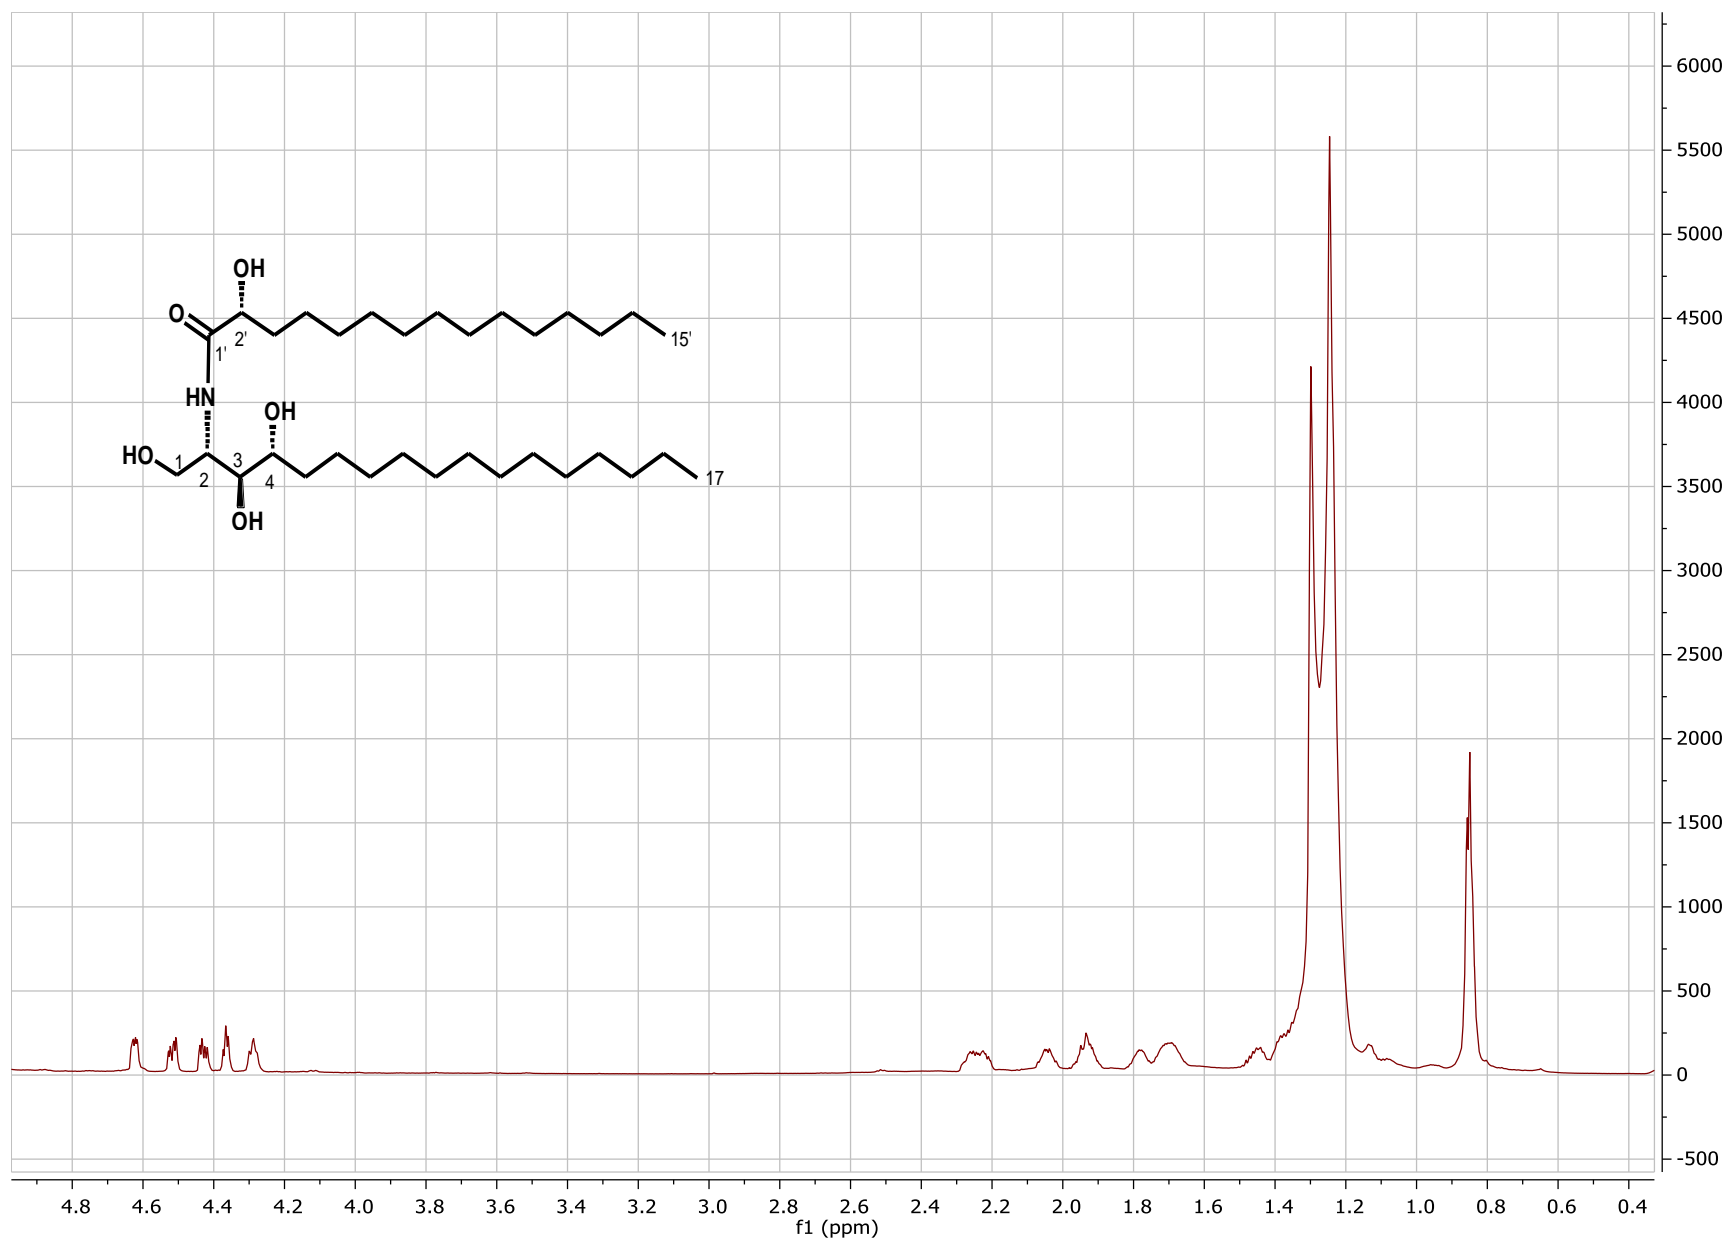

**Figure S3:** Partial expansions of the  $^1\text{H-NMR}$  spectrum of compound **1** in  $\text{C}_5\text{D}_5\text{N}$ , 400 MHz)

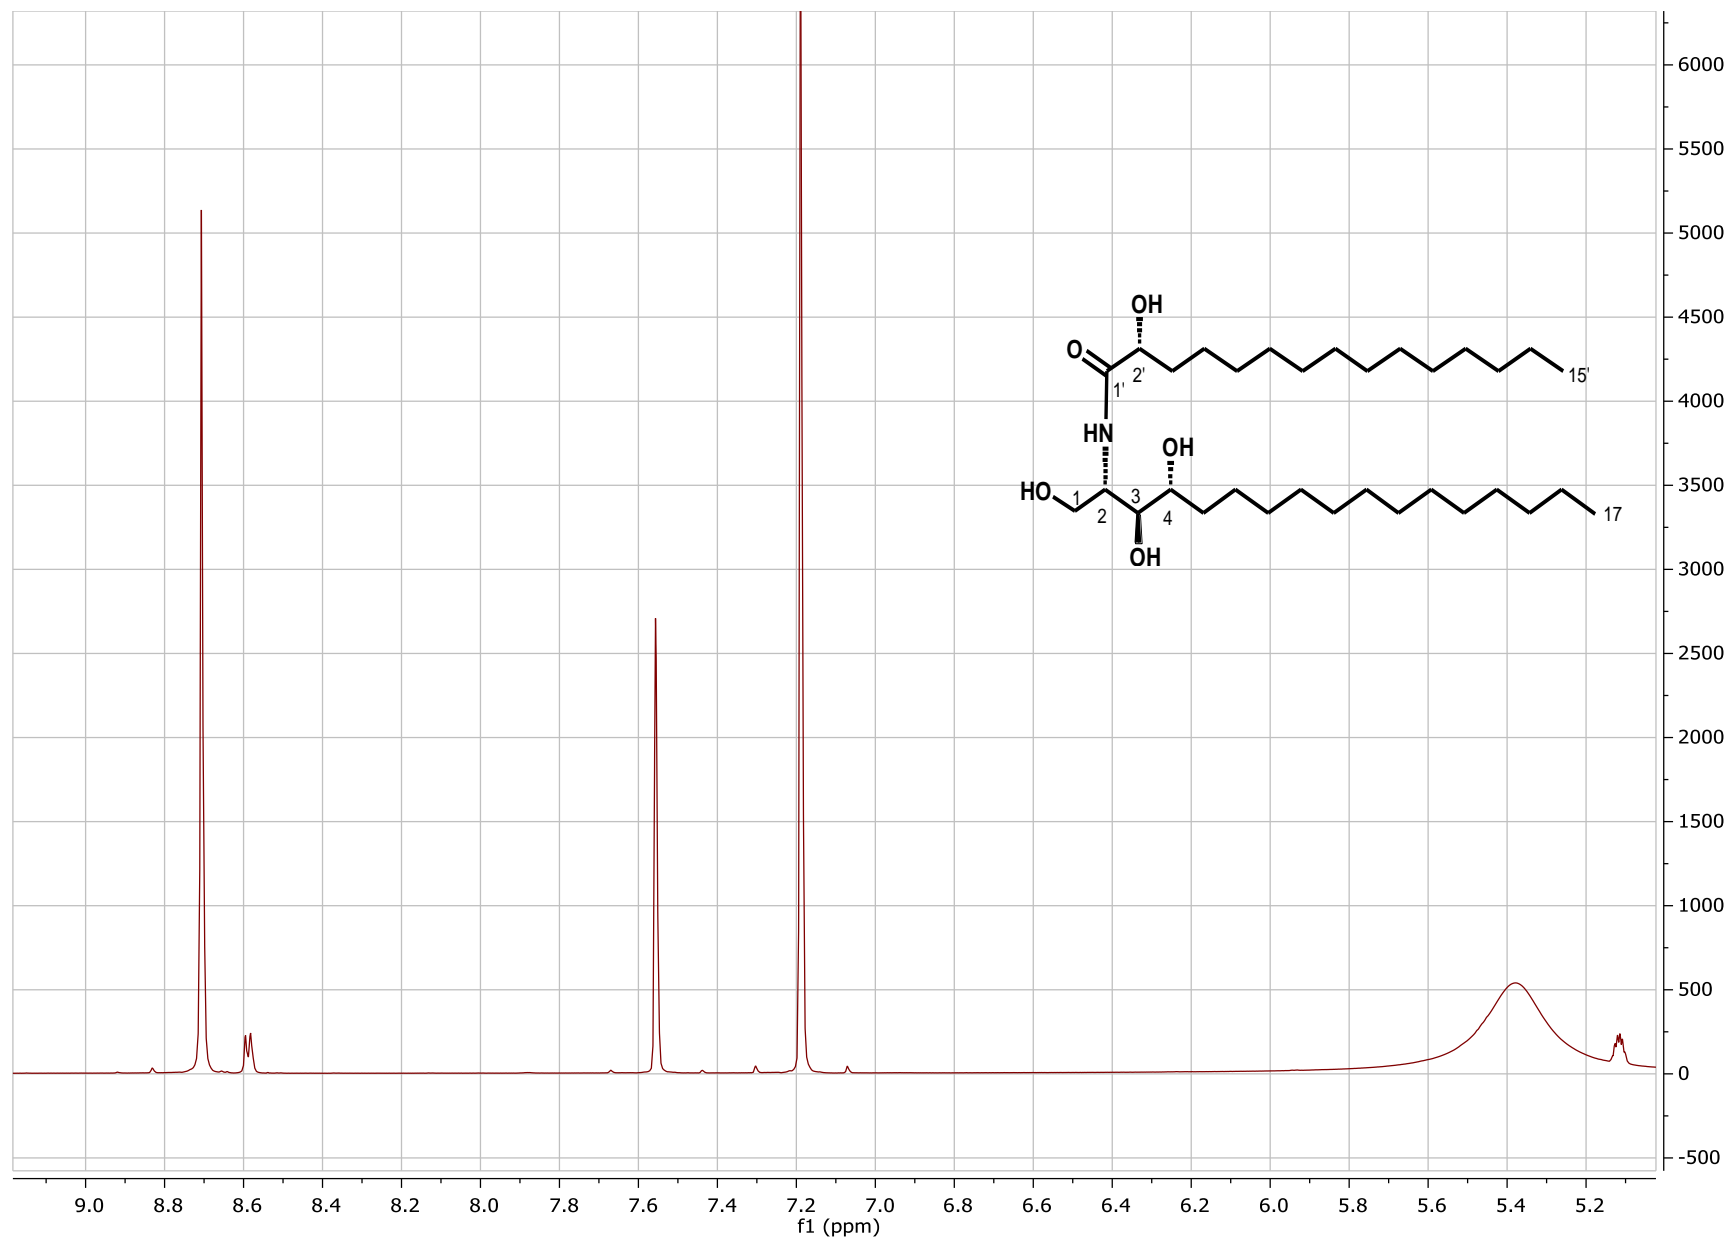

**Figure S4:** Partial expansions of the  $^1\text{H-NMR}$  spectrum of compound **1** in  $\text{C}_5\text{D}_5\text{N}$ , 400 MHz)

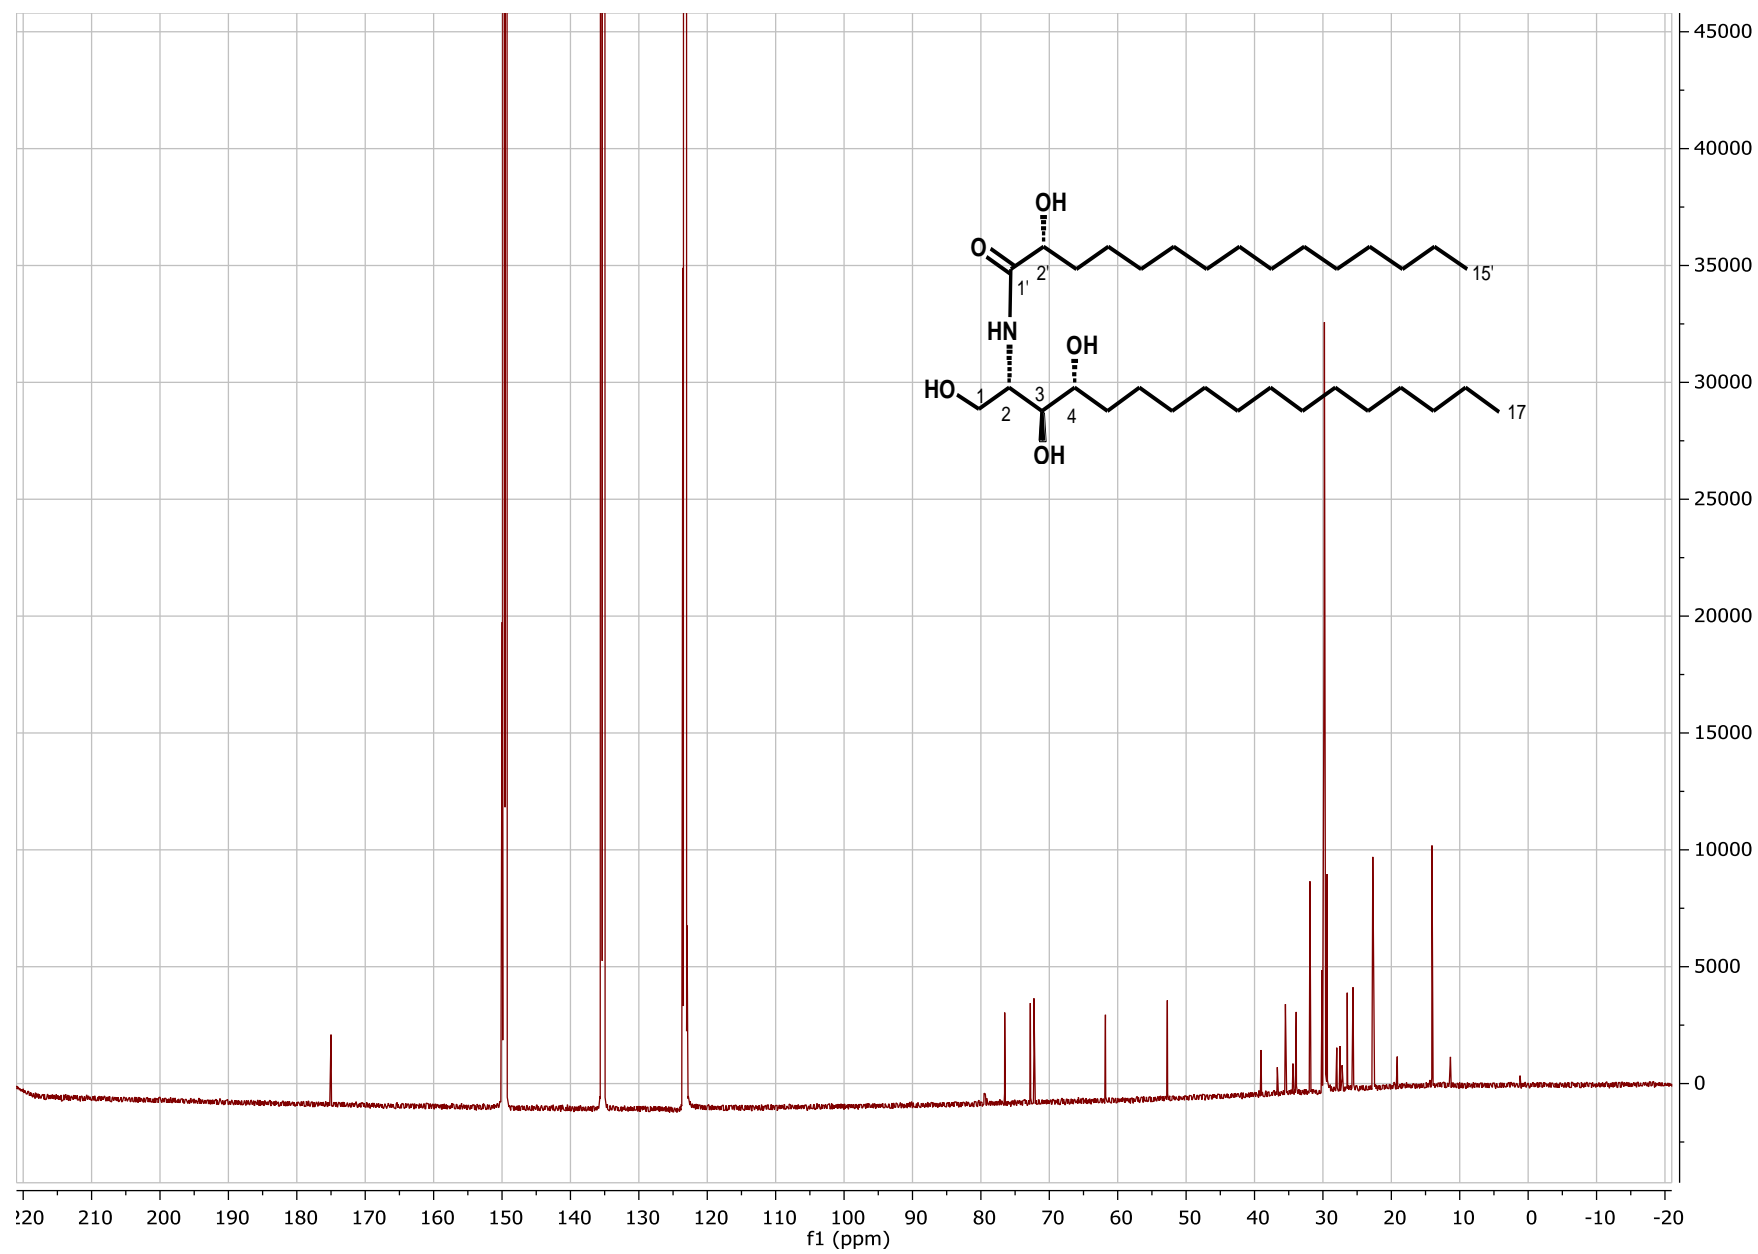

**Figure S5:**  $^{13}\text{C}$ -NMR spectrum of compound **1** in ( $\text{C}_5\text{D}_5\text{N}$ , 100 MHz)

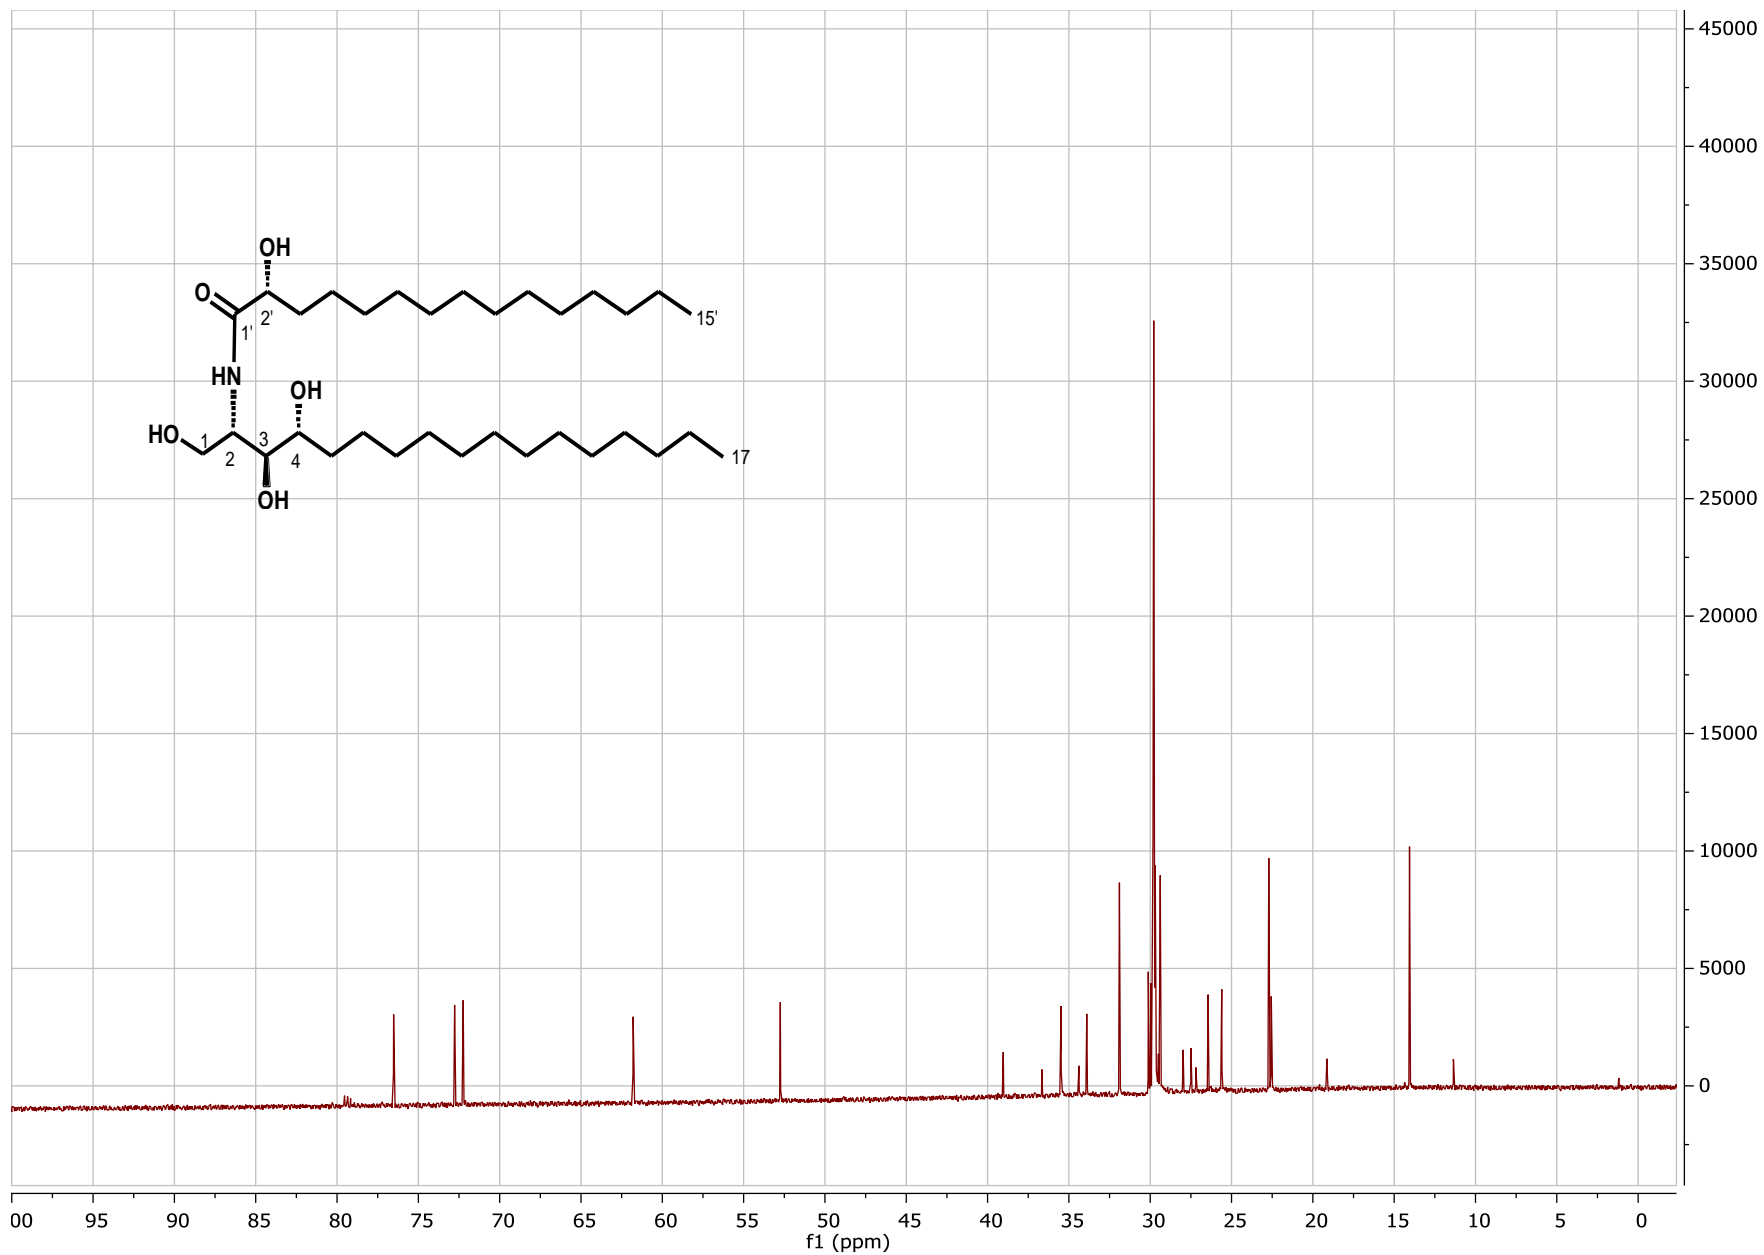

**Figure S6:** Partial expansion of the  $^{13}\text{C}$ -NMR spectrum of compound **1** in  $\text{C}_5\text{D}_5\text{N}$ , 100 MHz



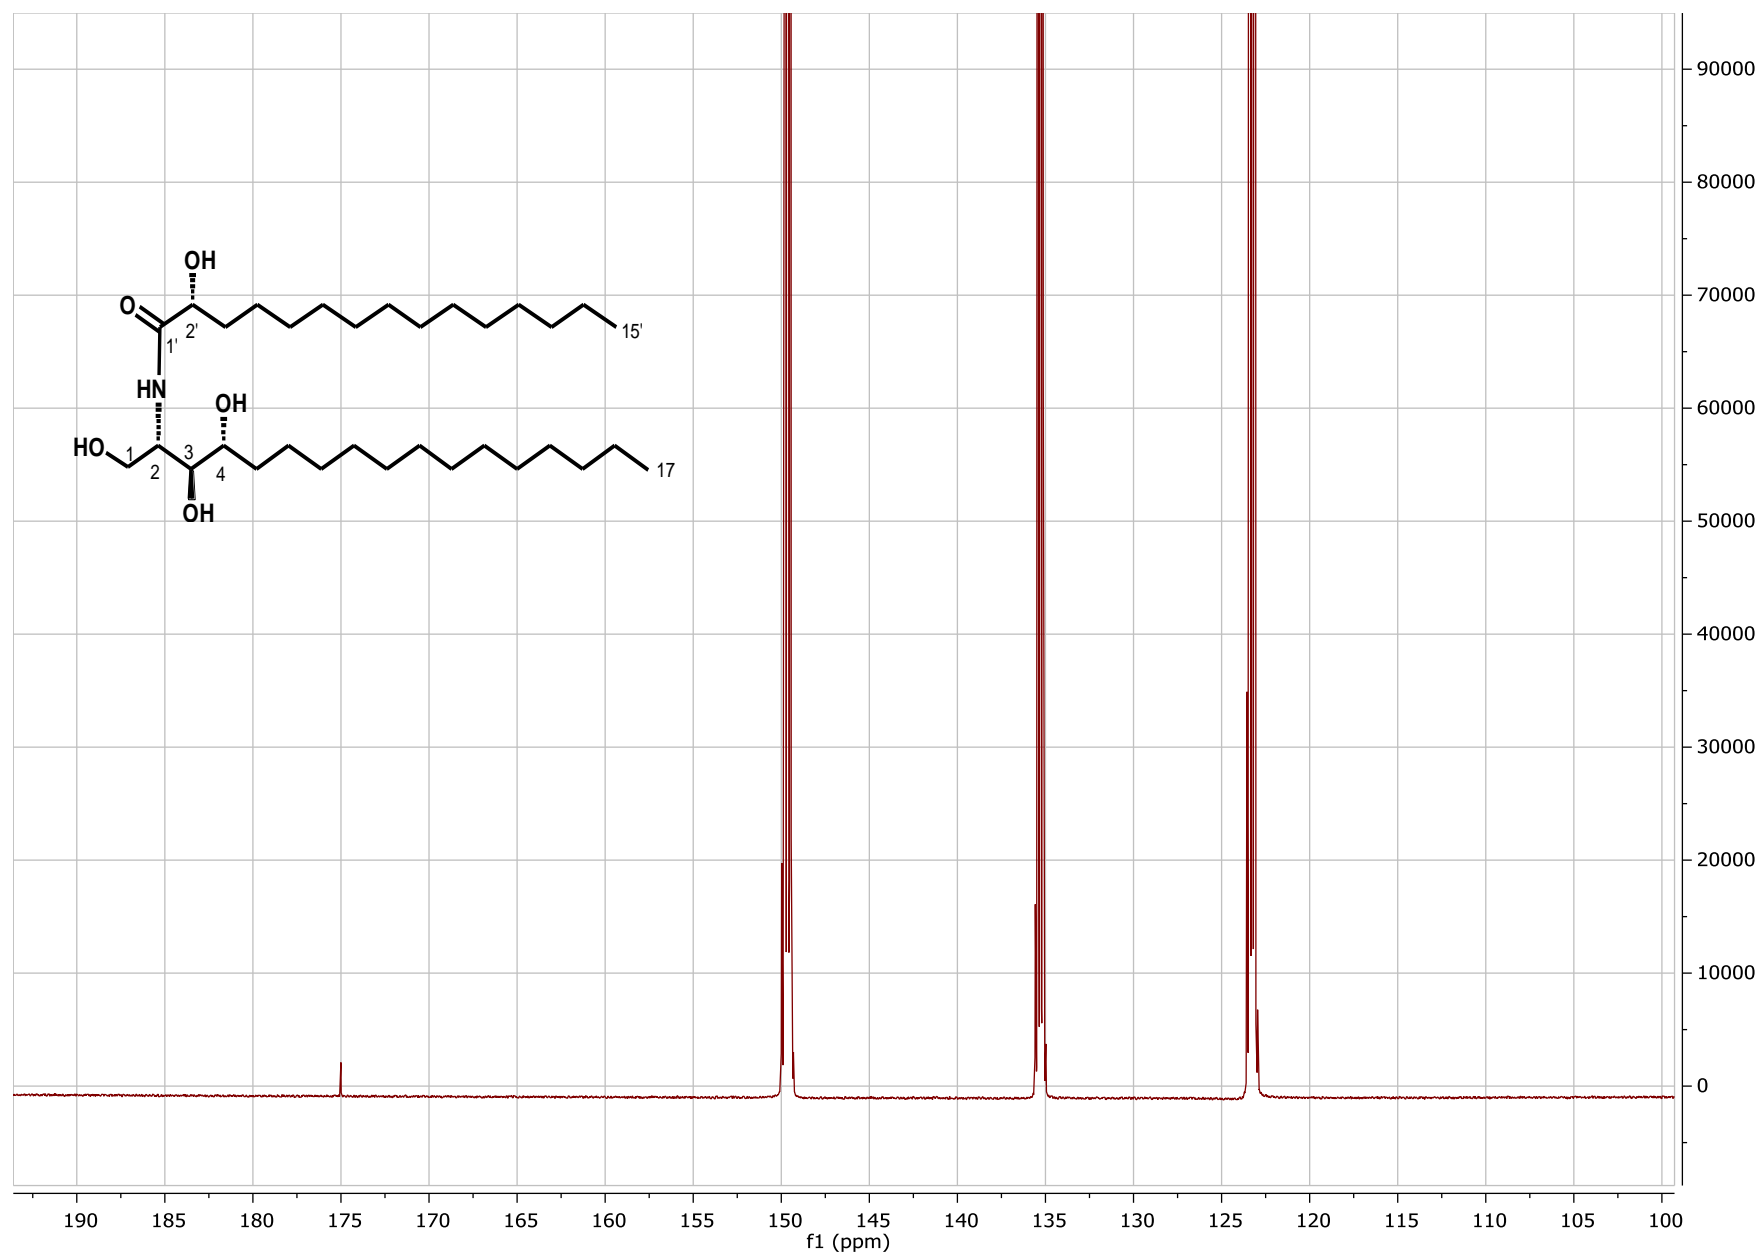

**Figure S7:** Partial expansion of the  $^{13}\text{C}$ -NMR spectrum of compound **1** in  $\text{C}_5\text{D}_5\text{N}$ , 100 MHz)

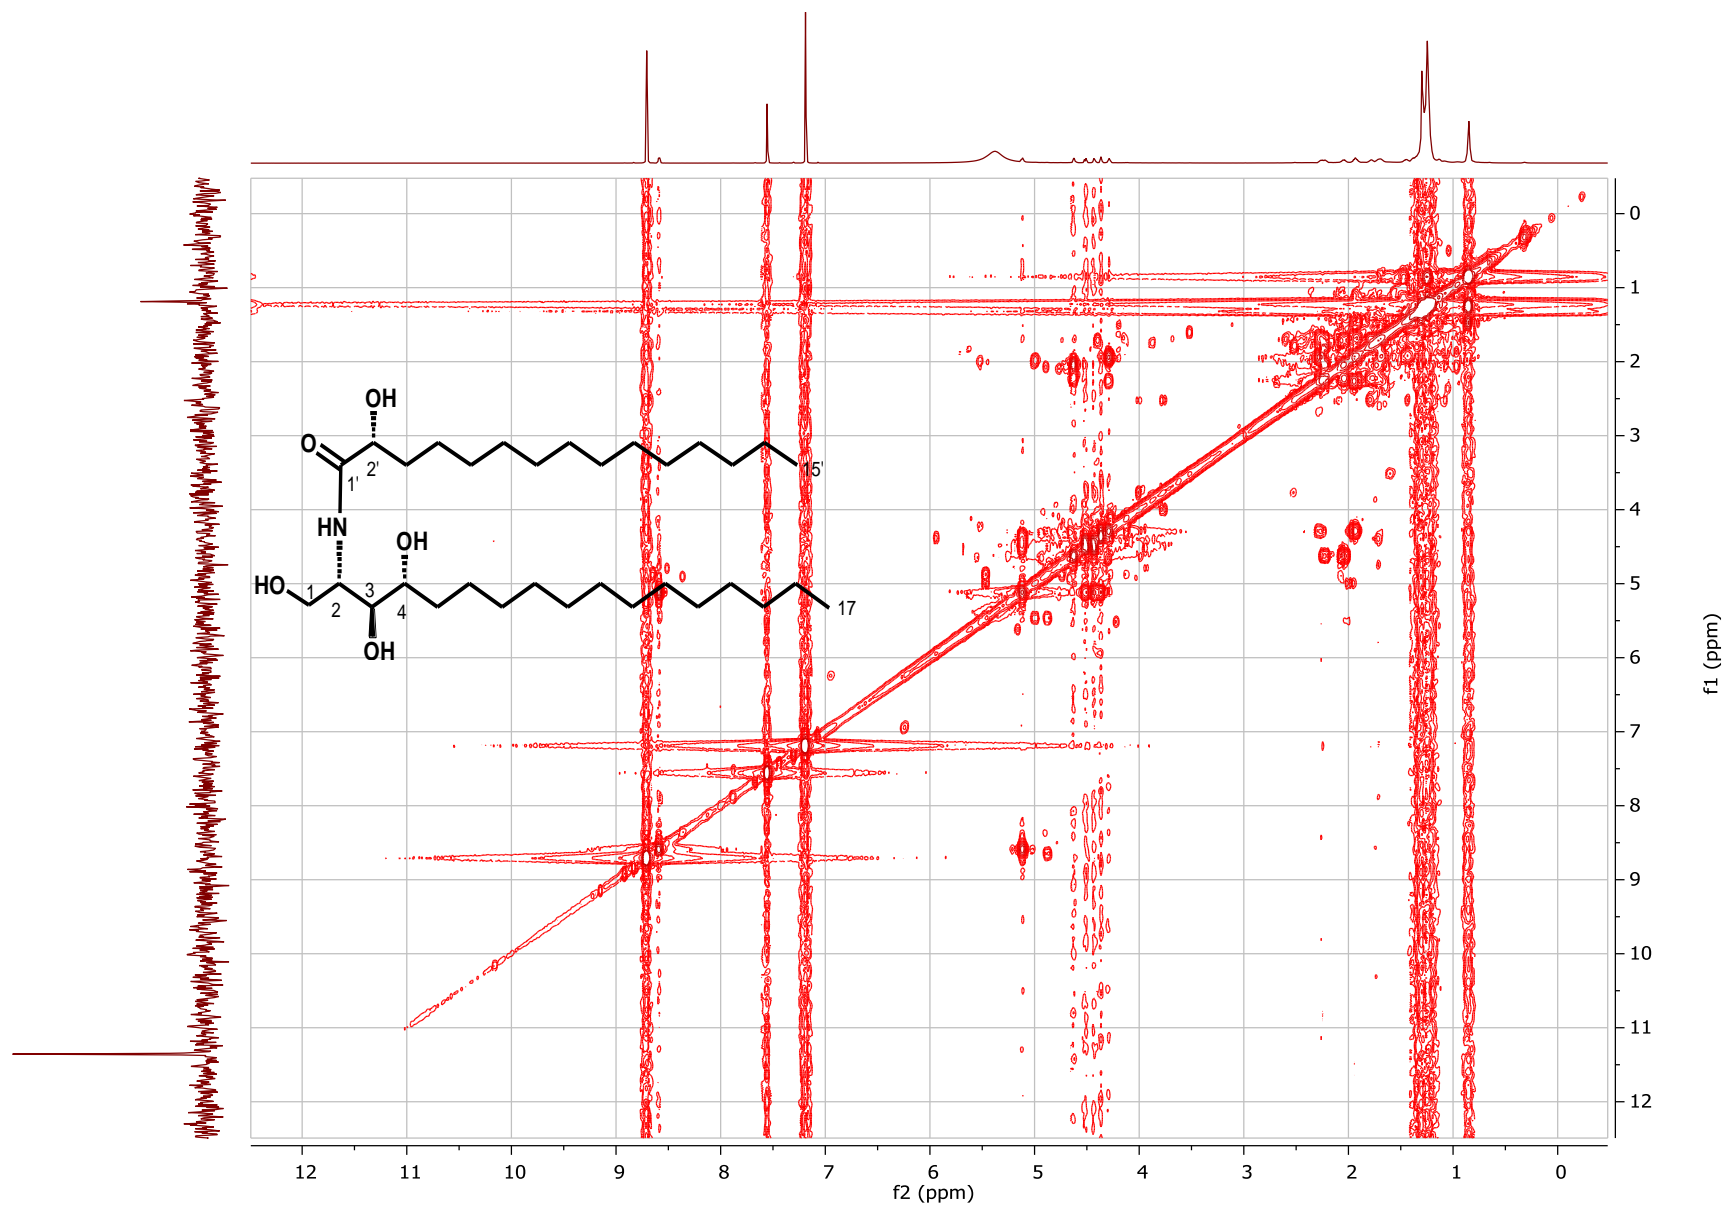

**Figure S8:** 2D-COSY spectrum of compound **1** in ( $\text{C}_5\text{D}_5\text{N}$ , 400 MHz)

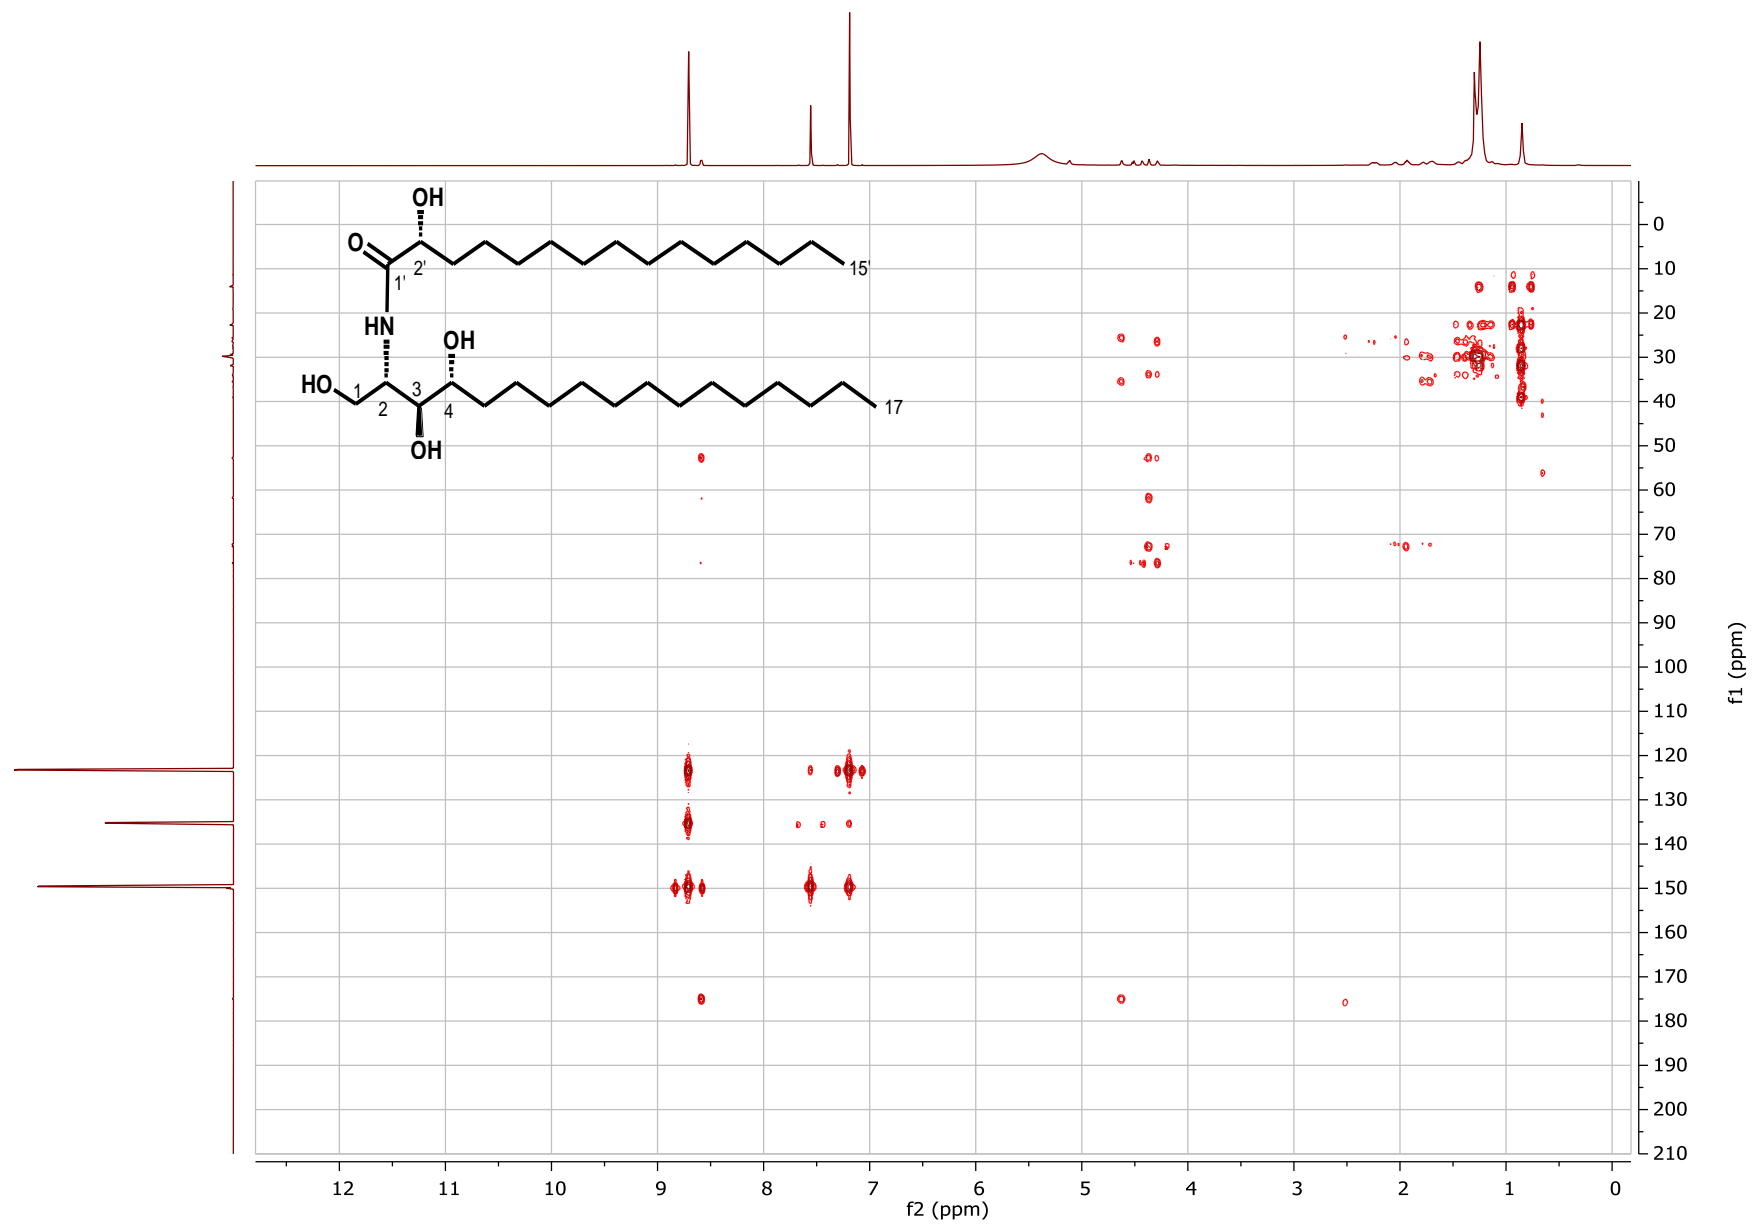

**Figure S9:** 2D-HMQC spectrum of compound **1** in ( $\text{C}_5\text{D}_5\text{N}$ , 400 MHz)

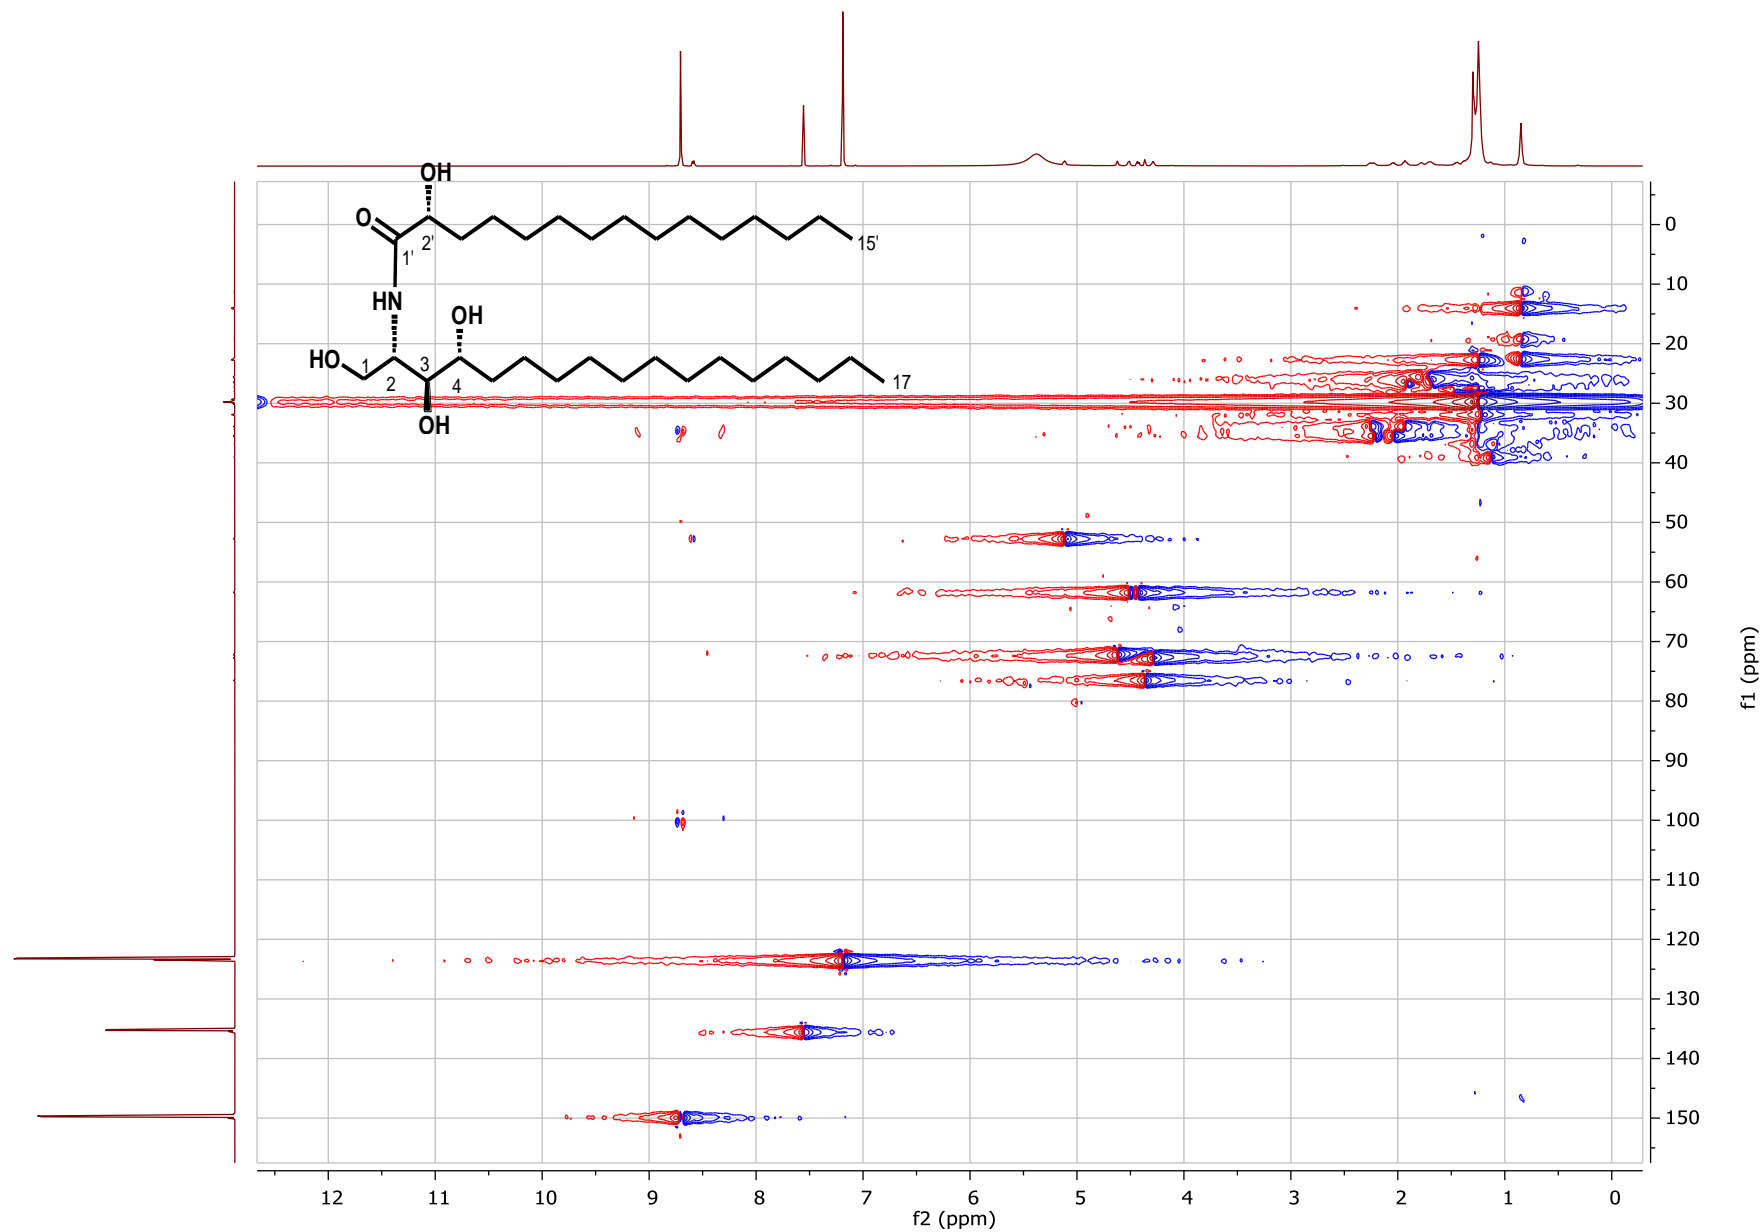

**Figure S10:** 2D-HMBC spectrum of compound **1** in (C<sub>5</sub>D<sub>5</sub>N, 400 MHz)

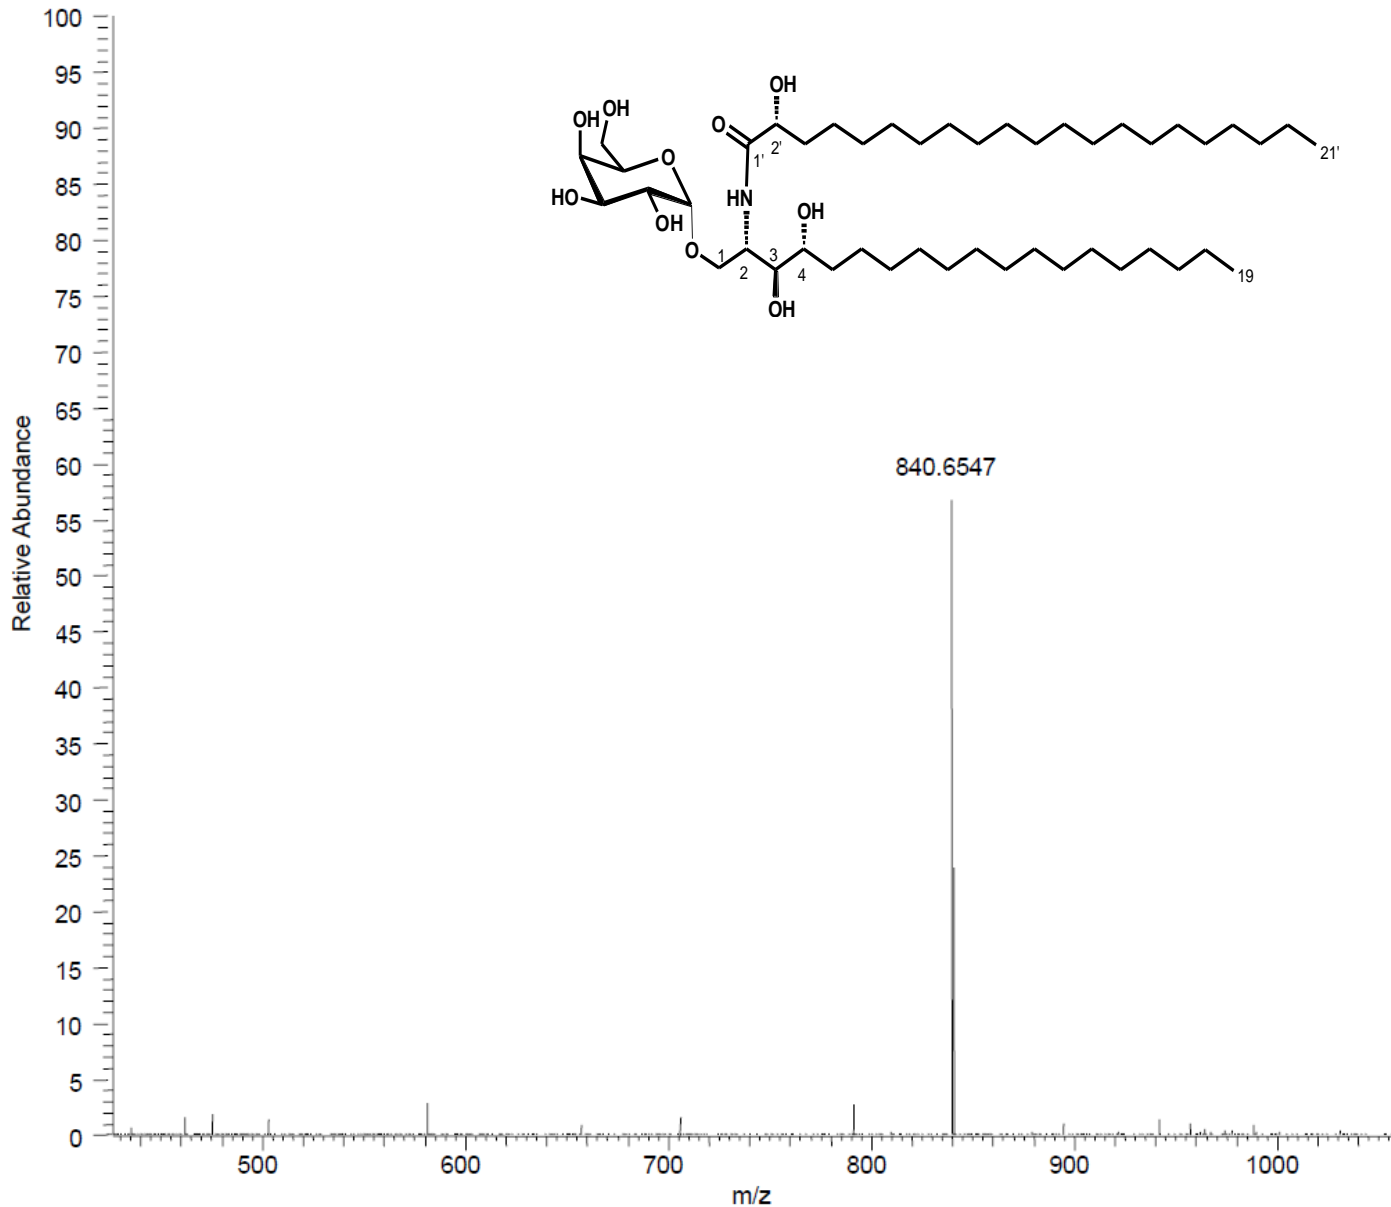

**Figure S11: HRMS of Compound 2 (+MS)**

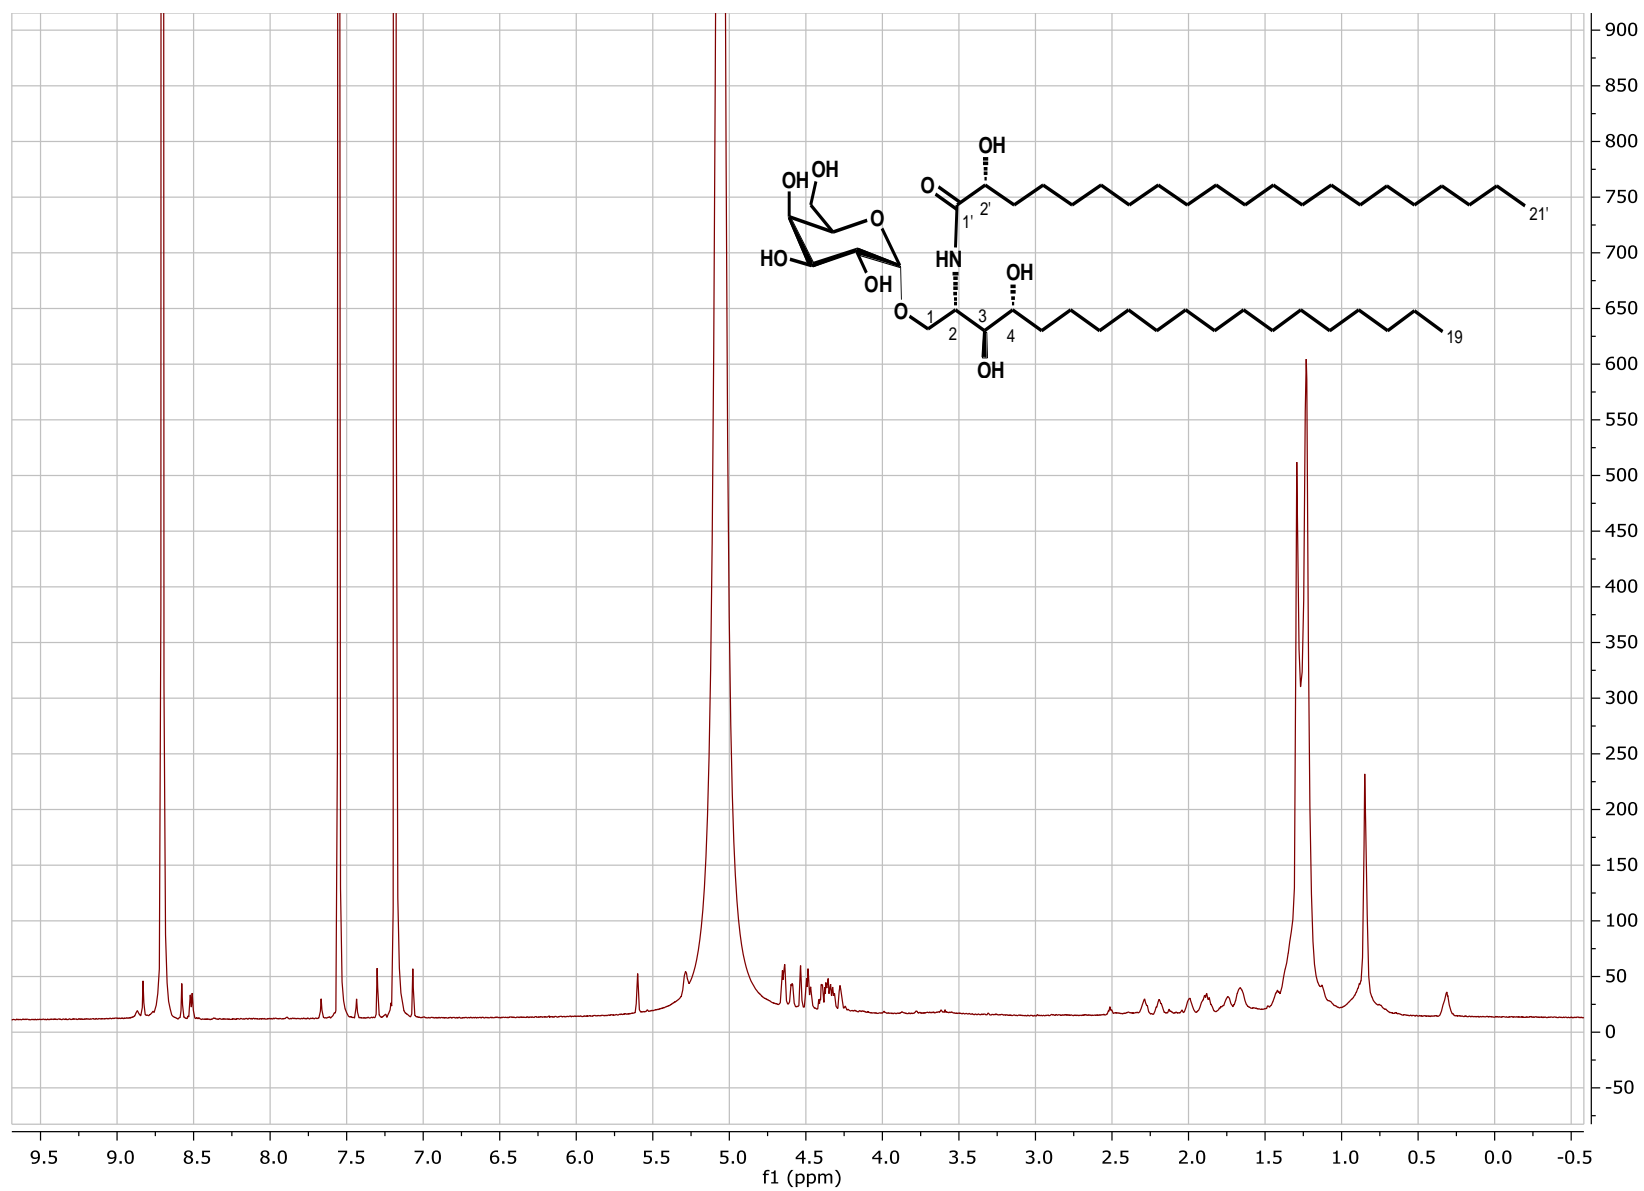

**Figure S12:** <sup>1</sup>H-NMR spectrum of compound 2 in (C<sub>5</sub>D<sub>5</sub>N, 400 MHz)

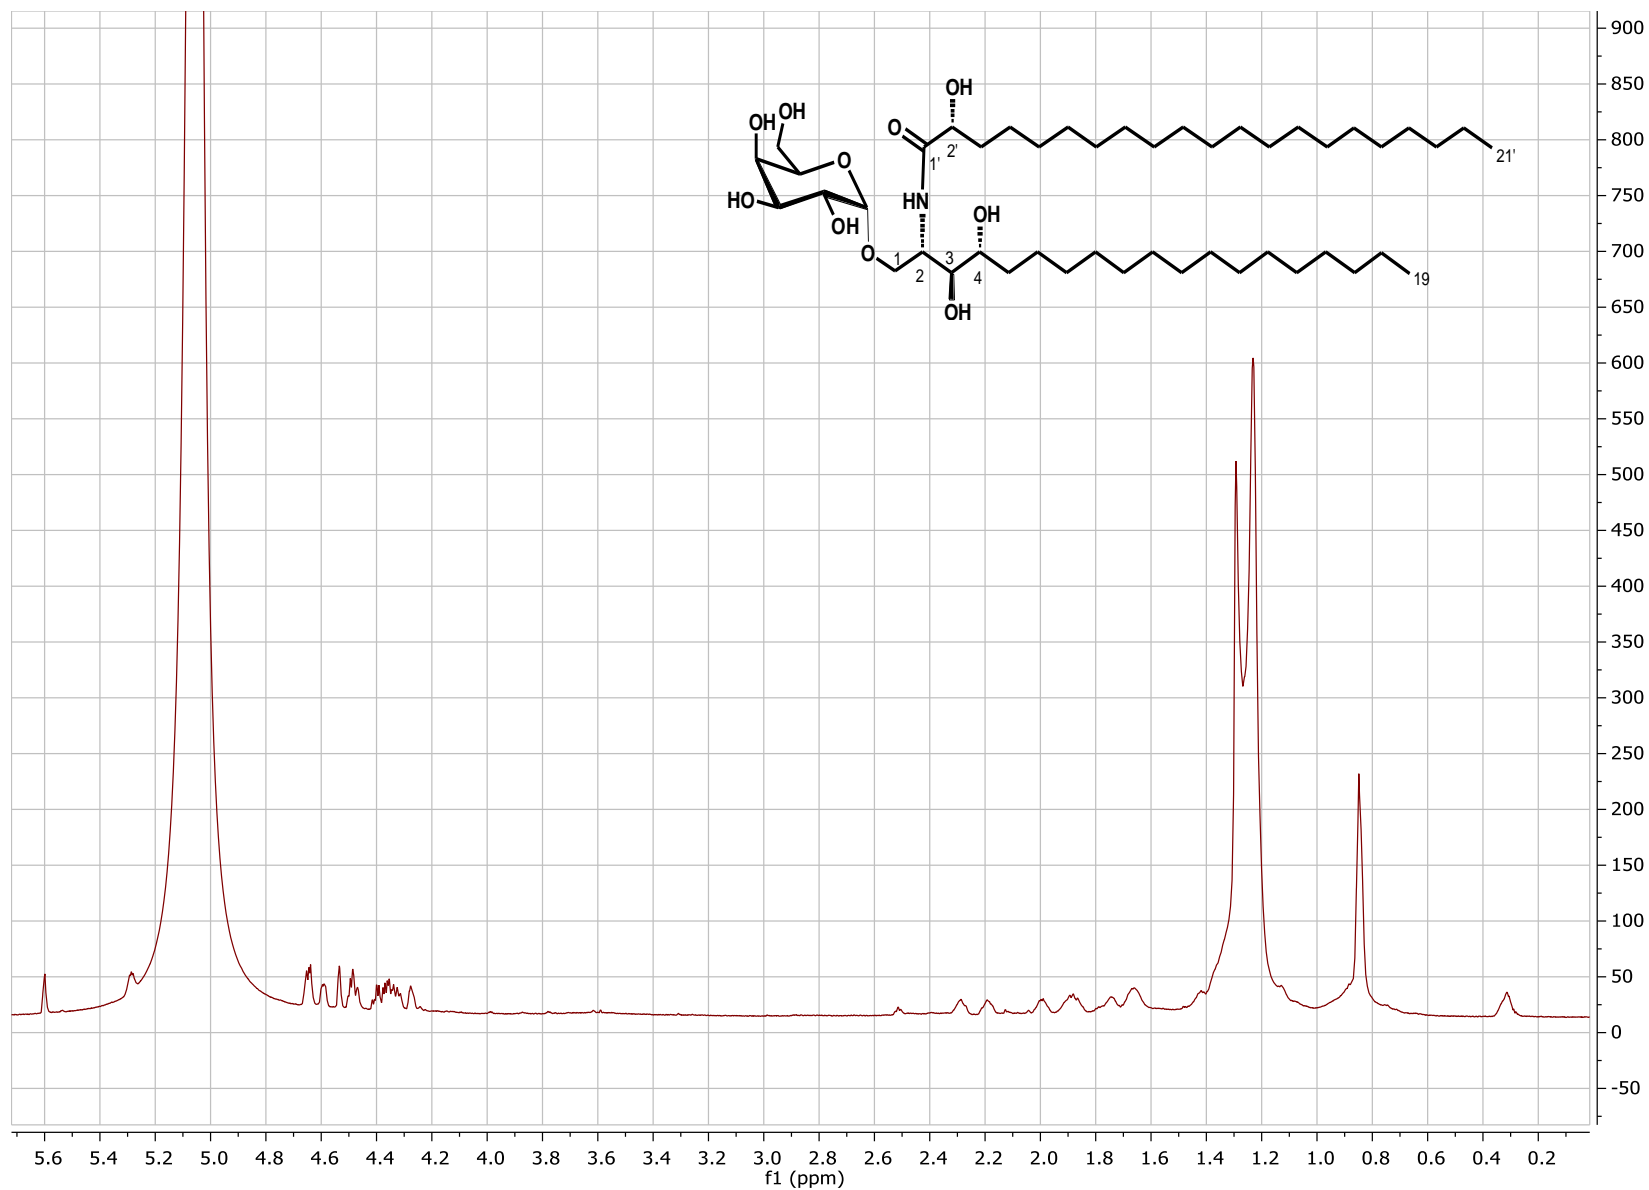

**Figure S13:** Partial expansions of the  $^1\text{H-NMR}$  spectrum of compound **2** in  $\text{C}_5\text{D}_5\text{N}$ , 400 MHz)

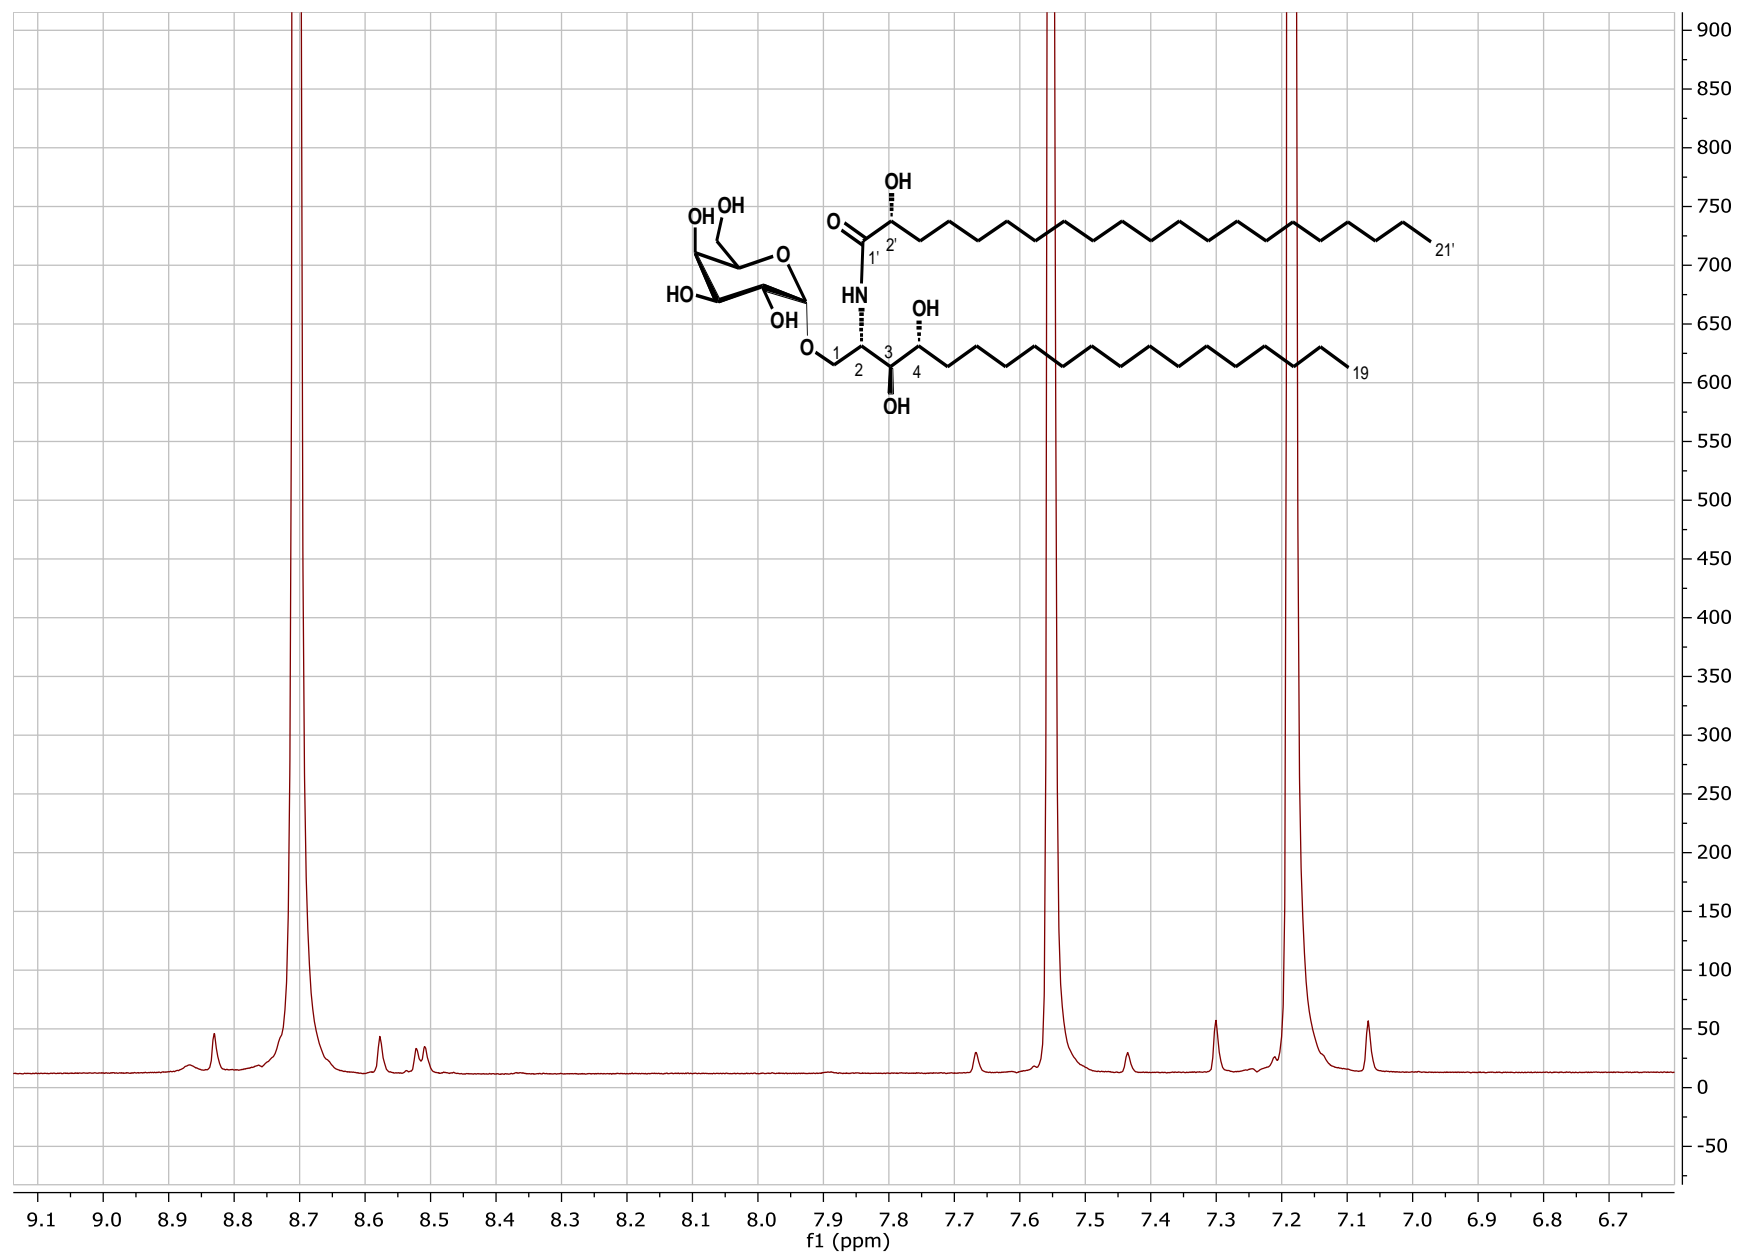

**Figure S14:** Partial expansions of the  $^1\text{H-NMR}$  spectrum of compound **2** in  $\text{C}_5\text{D}_5\text{N}$ , 400 MHz)



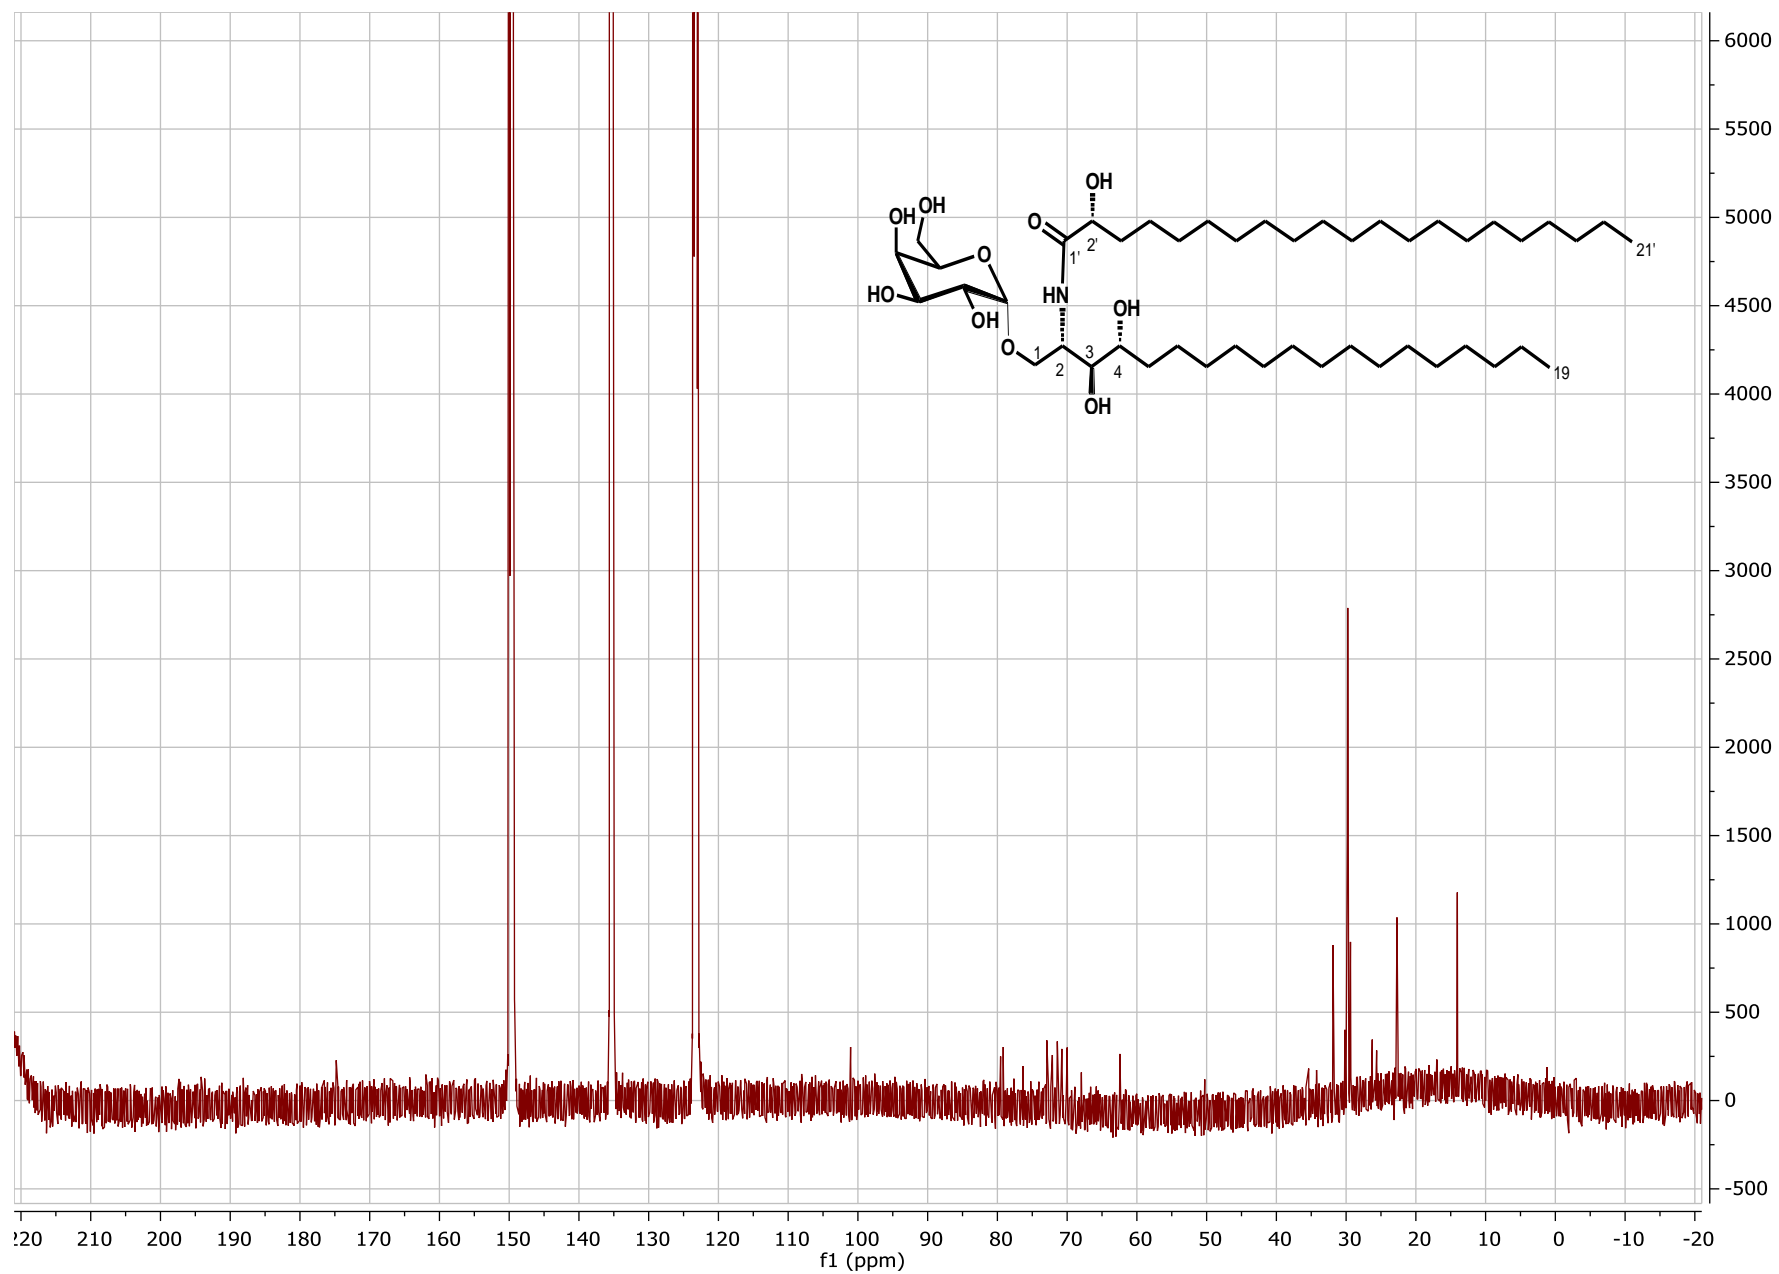

**Figure S15:**  $^{13}\text{C}$ -NMR spectrum of compound **2** in  $(\text{C}_3\text{D}_5\text{N}, 100 \text{ MHz})$

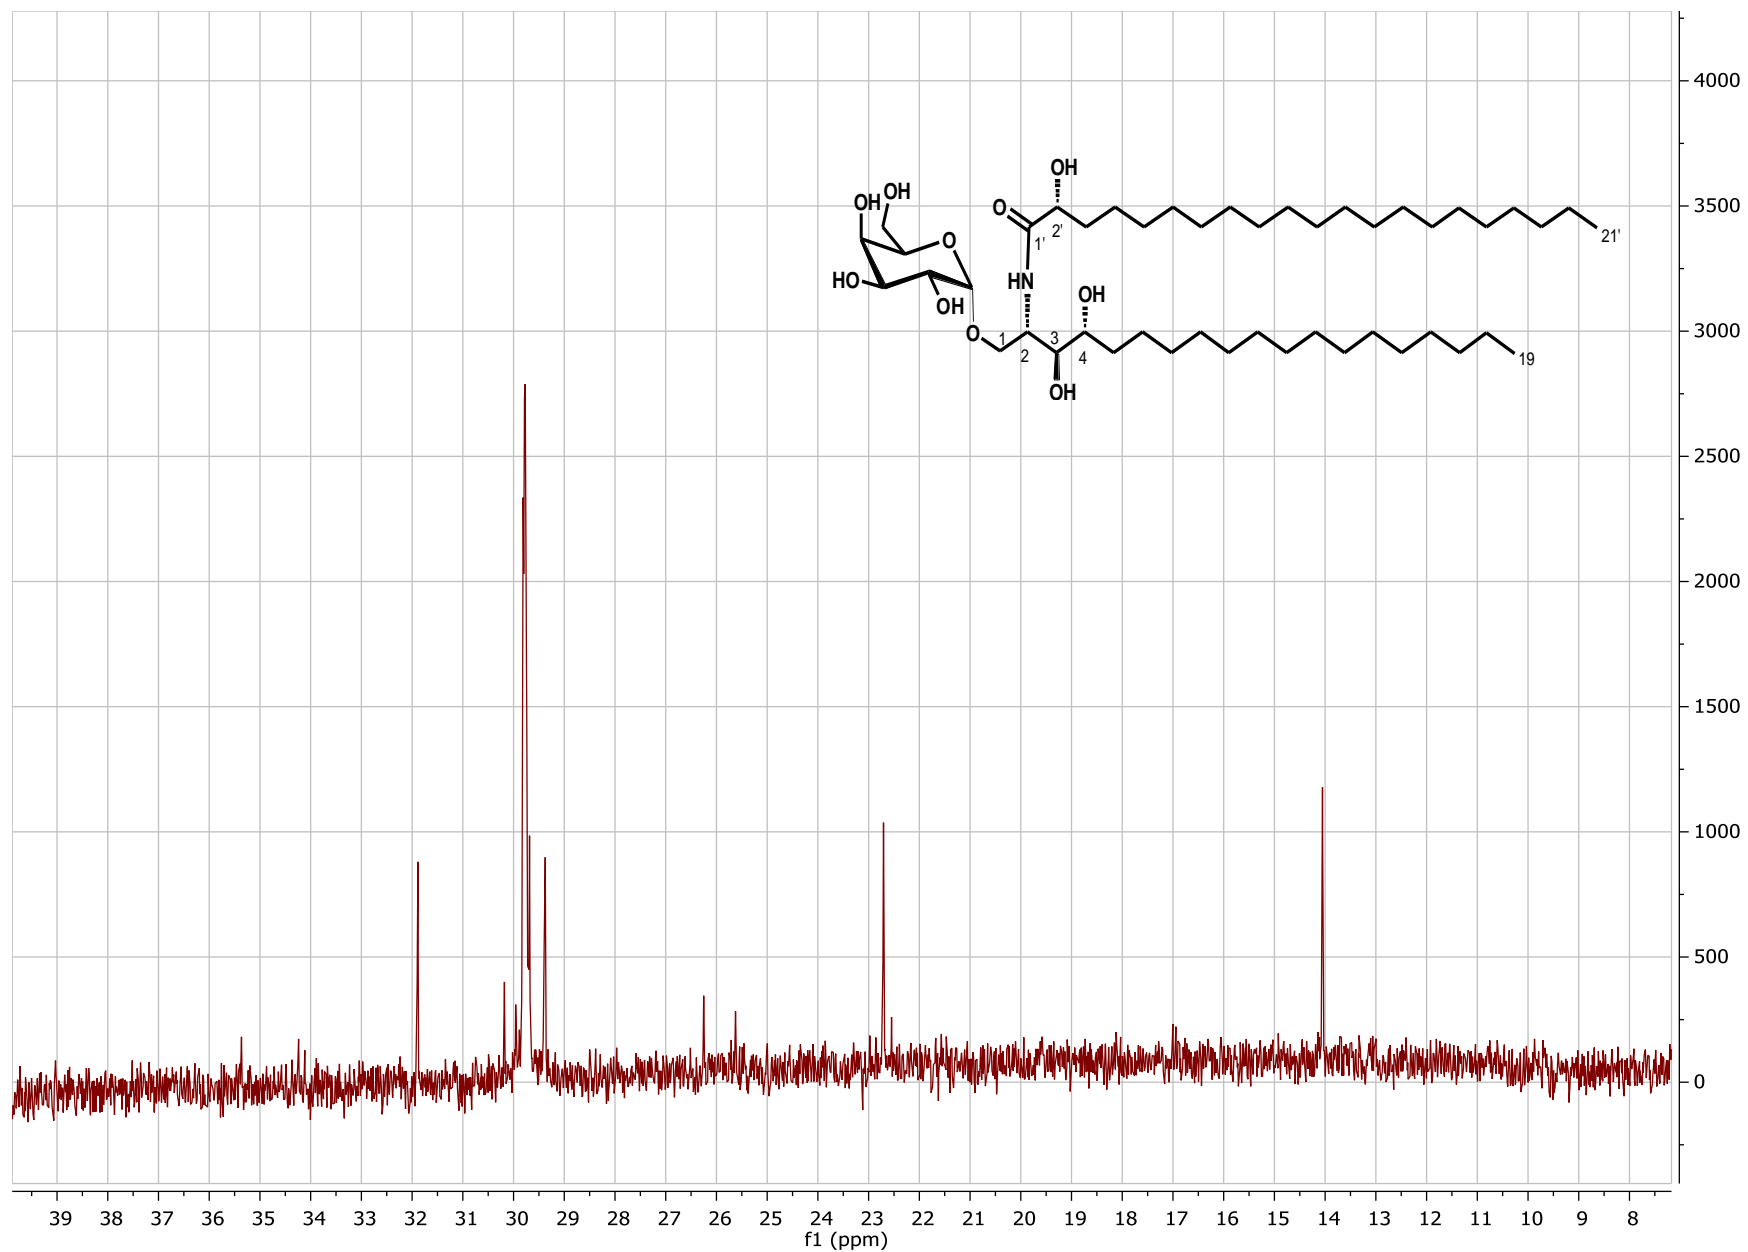

**Figure S16:** Partial expansion of the  $^{13}\text{C}$ -NMR spectrum of compound **2** in  $(\text{C}_5\text{D}_5\text{N})$ , 100 MHz

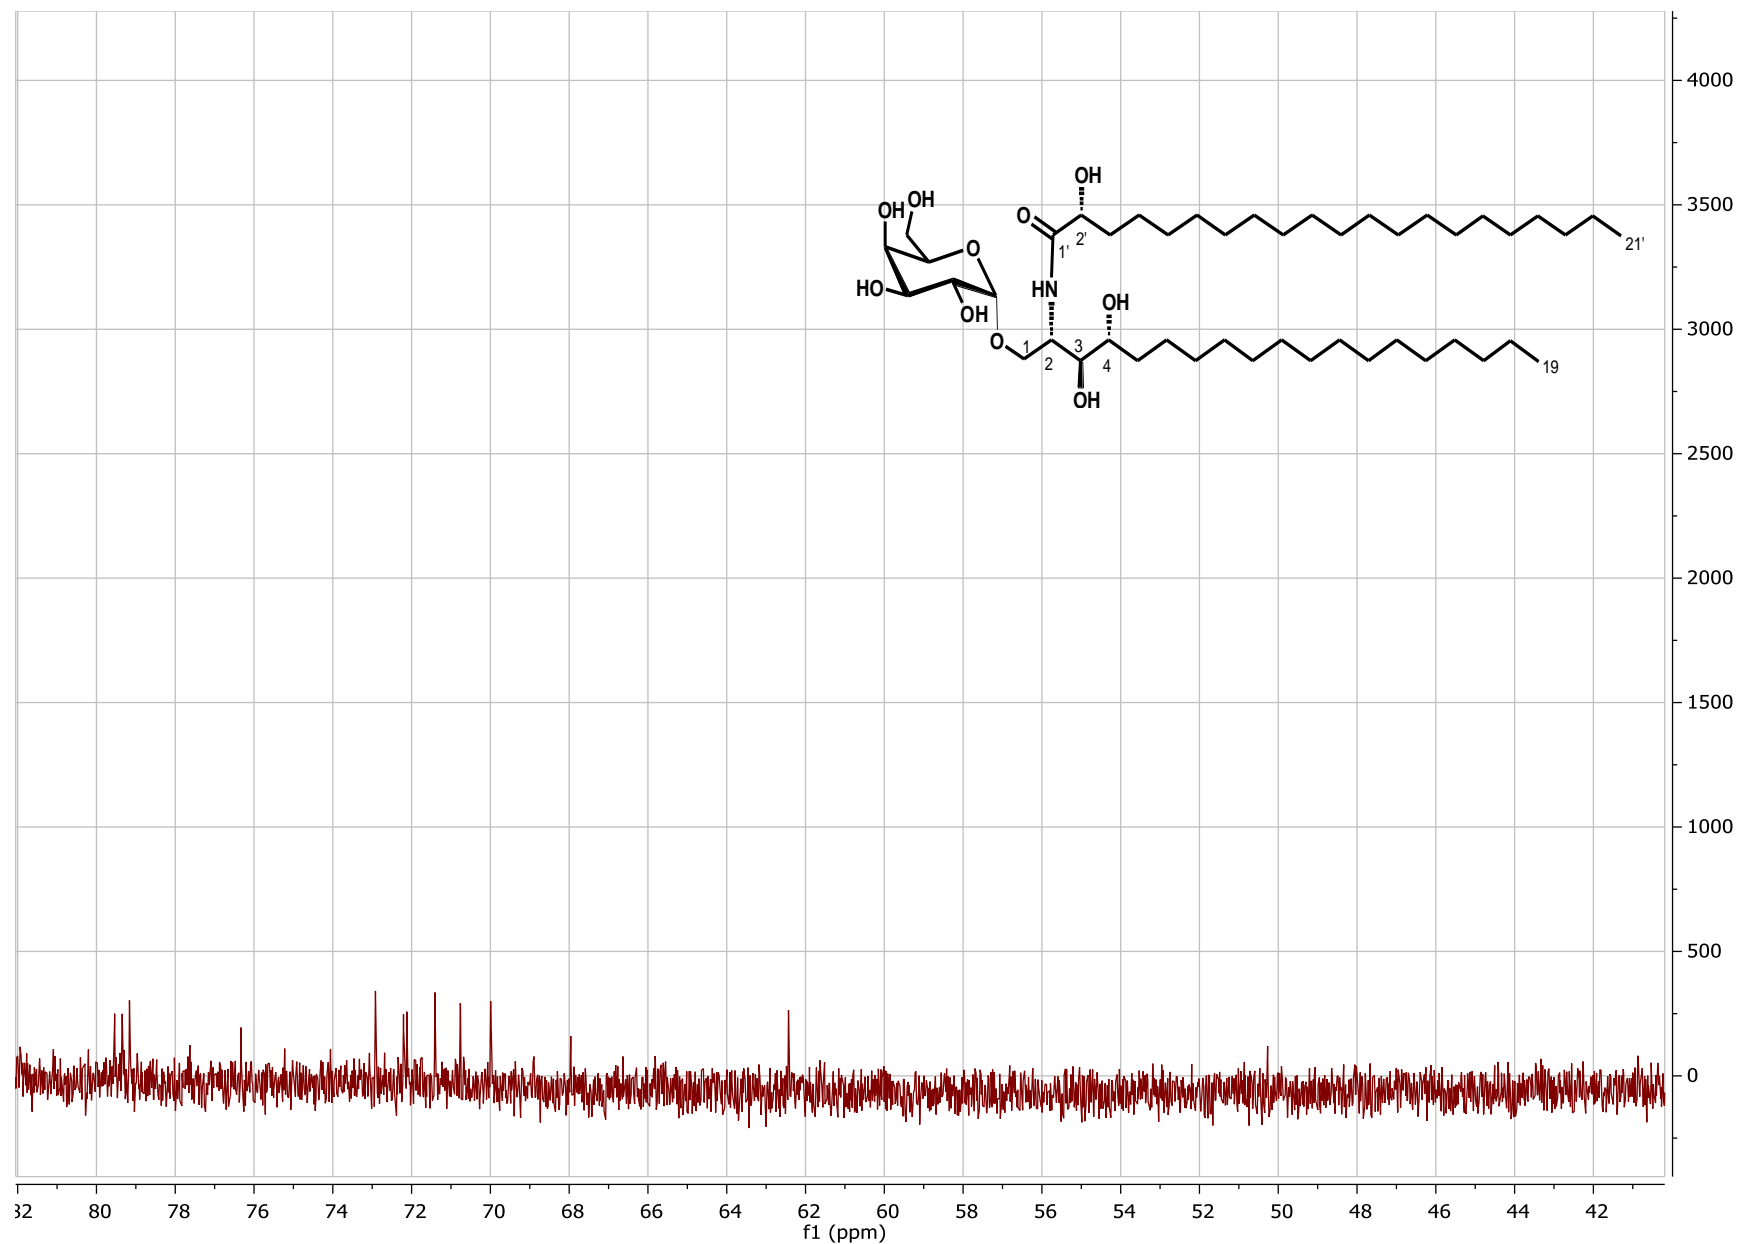

**Figure S17:** Partial expansion of the  $^{13}\text{C}$ -NMR spectrum of compound **2** in ( $\text{C}_5\text{D}_5\text{N}$ , 100 MHz)

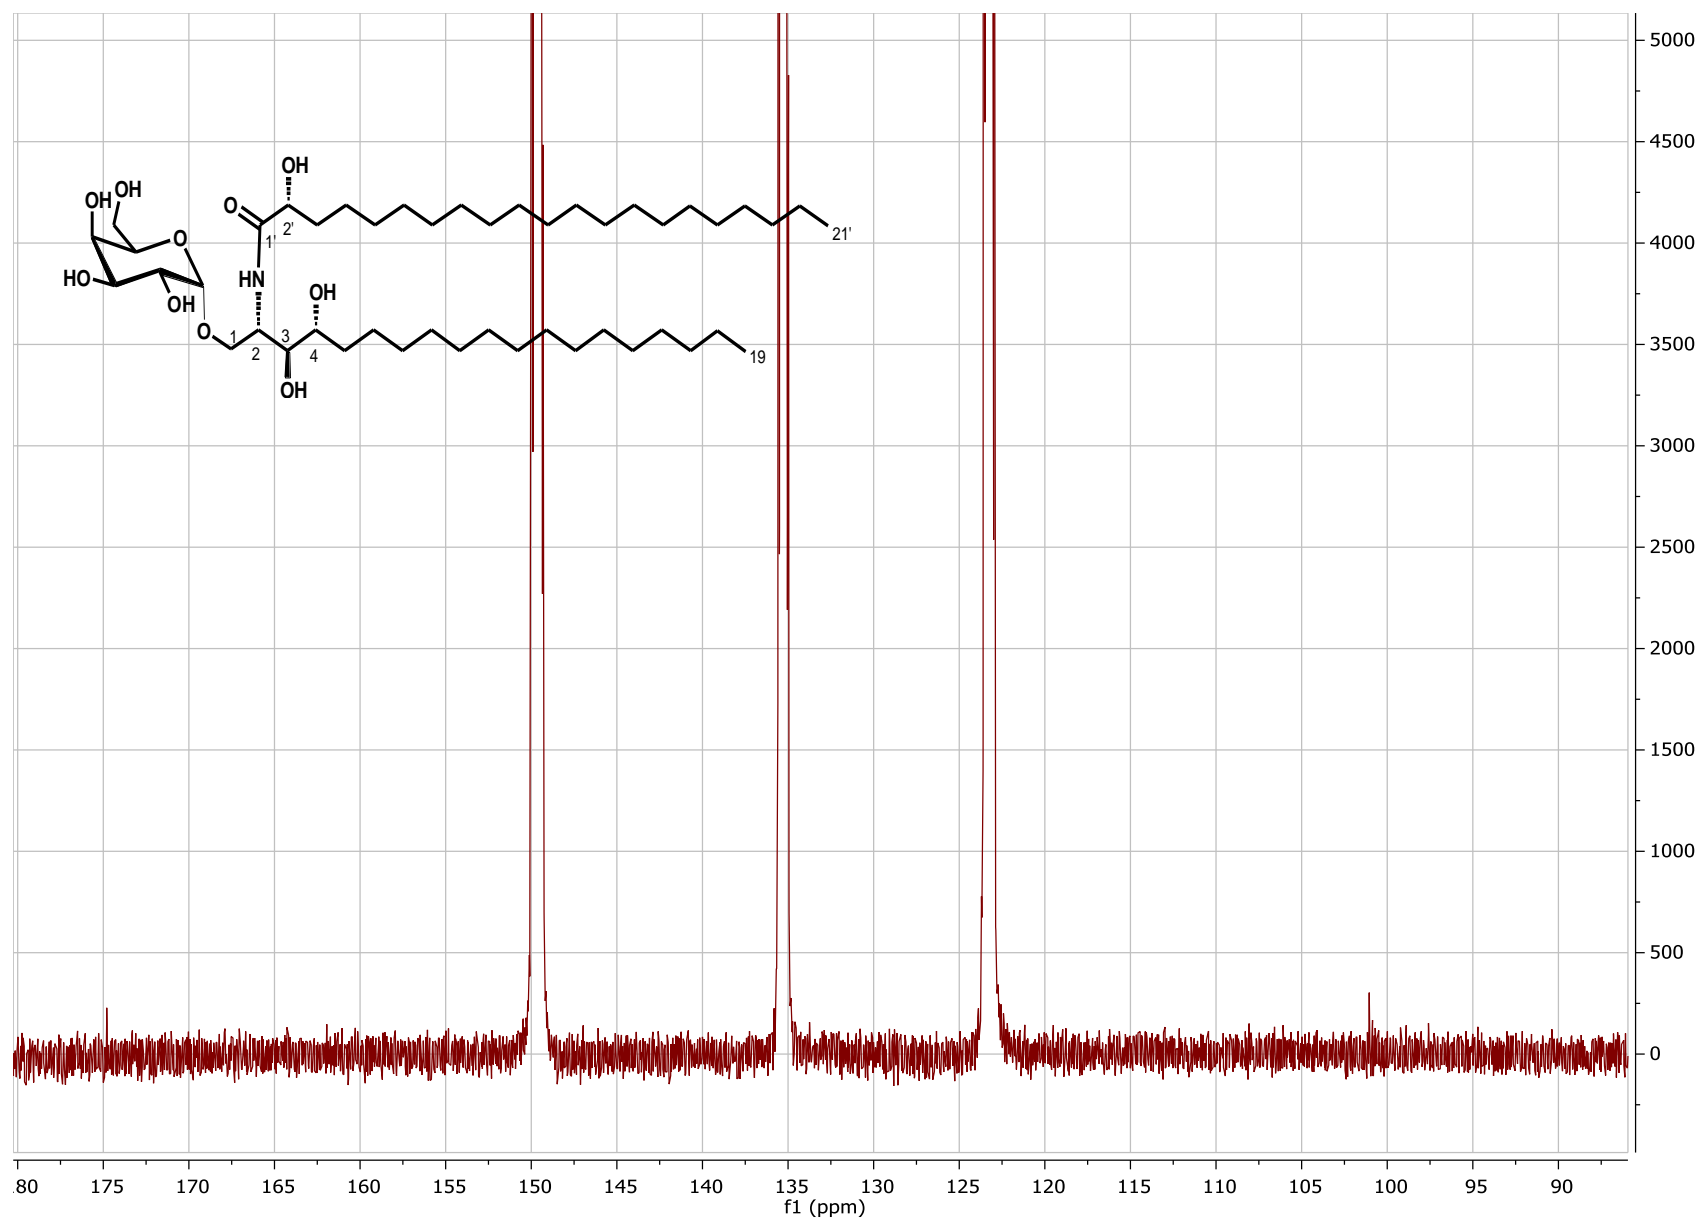

**Figure S18:** Partial expansion of the  $^{13}\text{C}$ -NMR spectrum of compound **2** in  $(\text{C}_5\text{D}_5\text{N}, 100 \text{ MHz})$

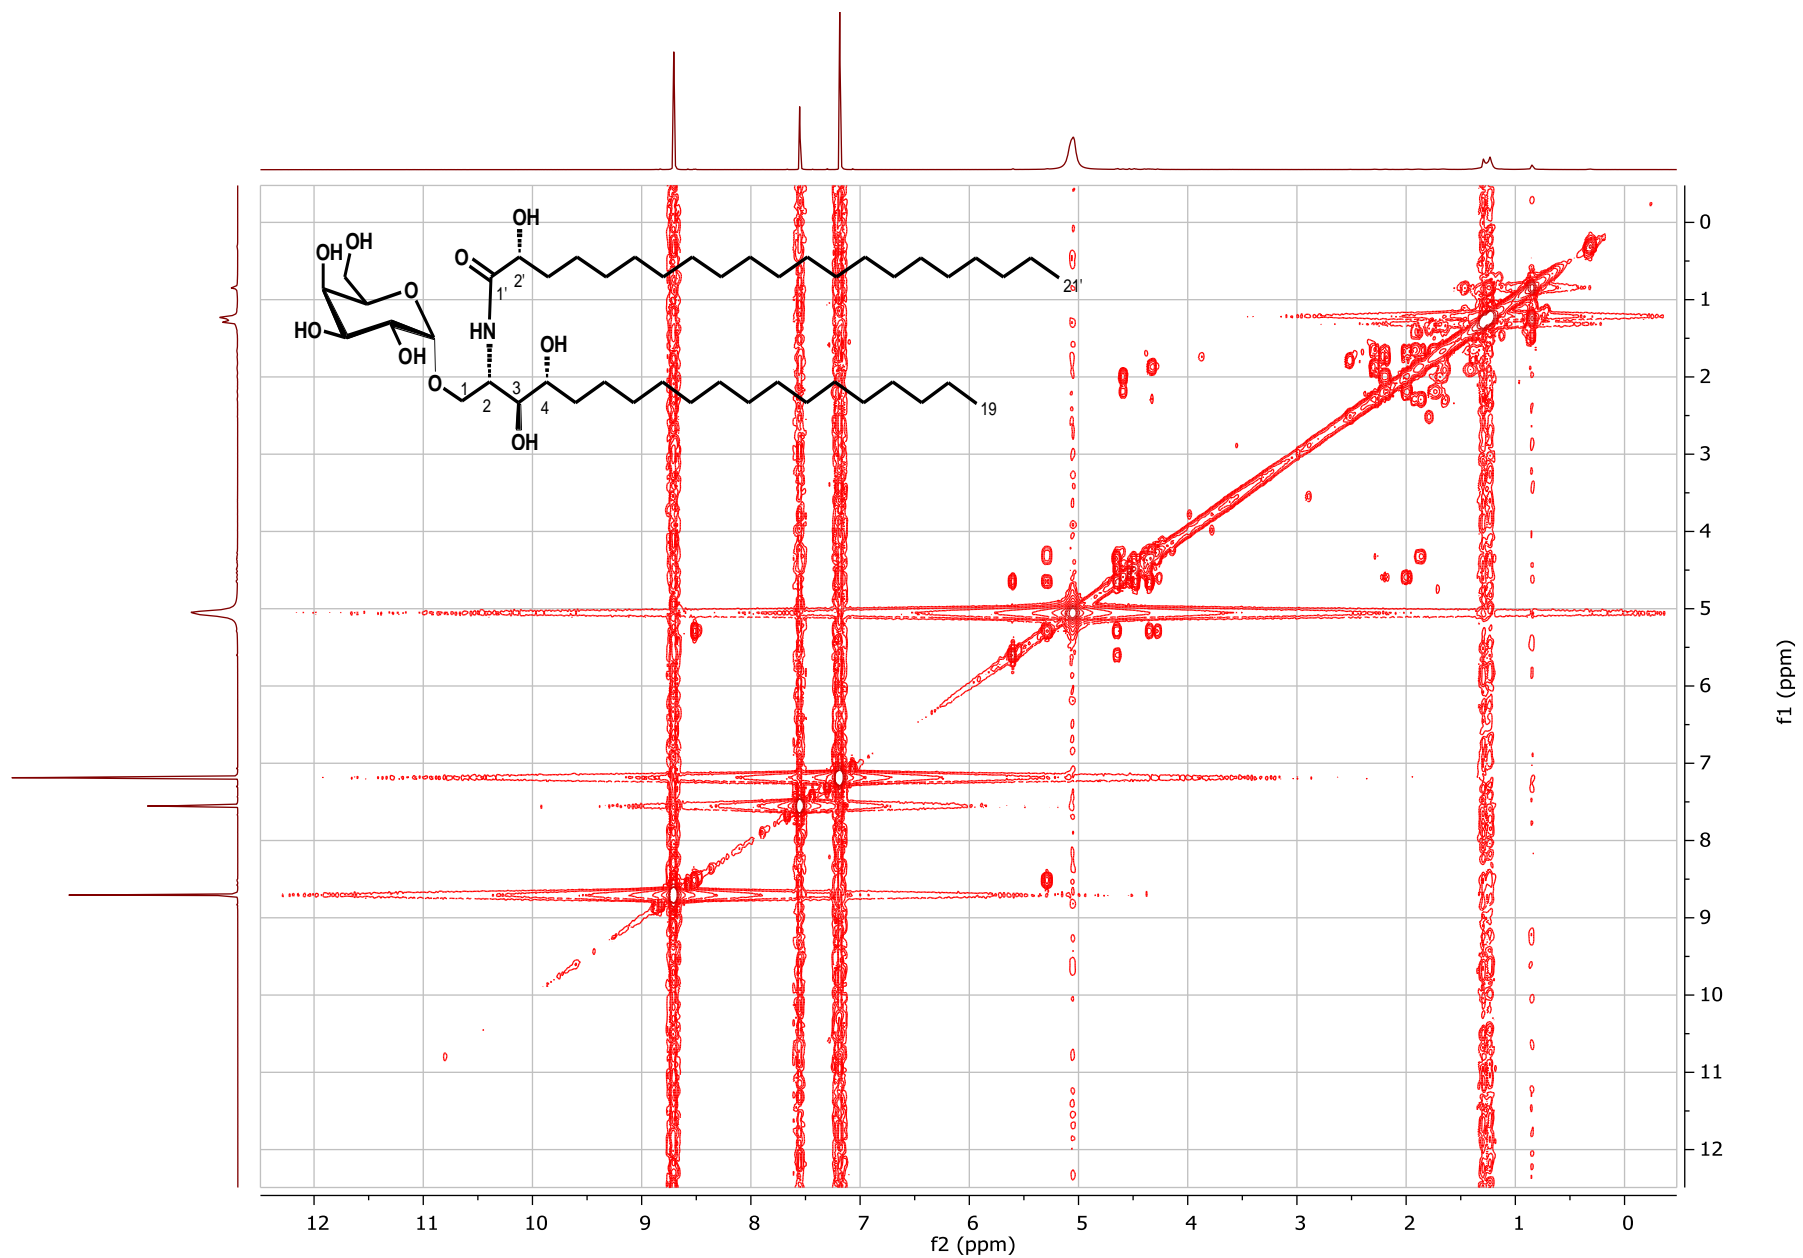

**Figure S19:** 2D-COSY spectrum of compound **2** in (C<sub>5</sub>D<sub>5</sub>N, 400 MHz)

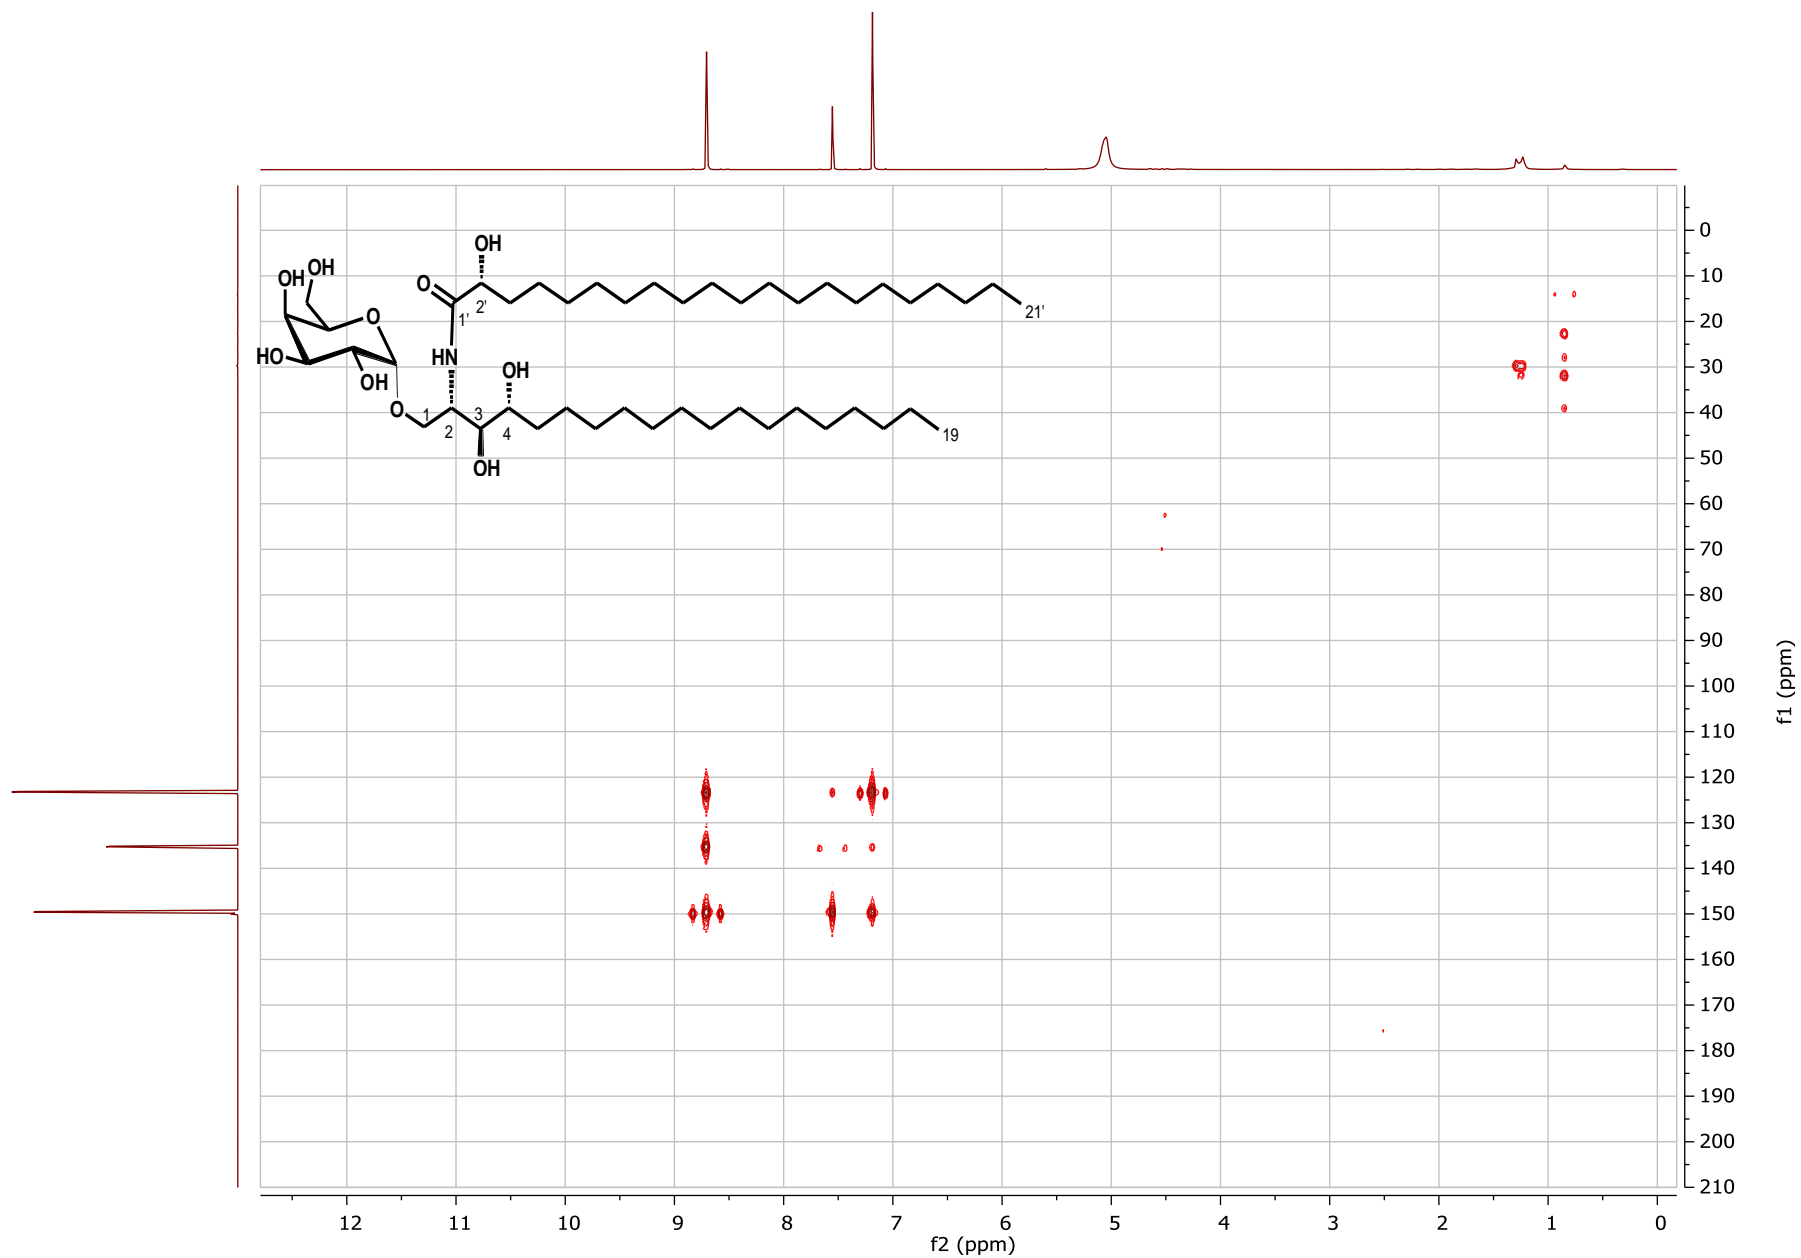

**Figure S20:** 2D-HMQC spectrum of compound **2** in ( $\text{C}_5\text{D}_5\text{N}$ , 400 MHz)

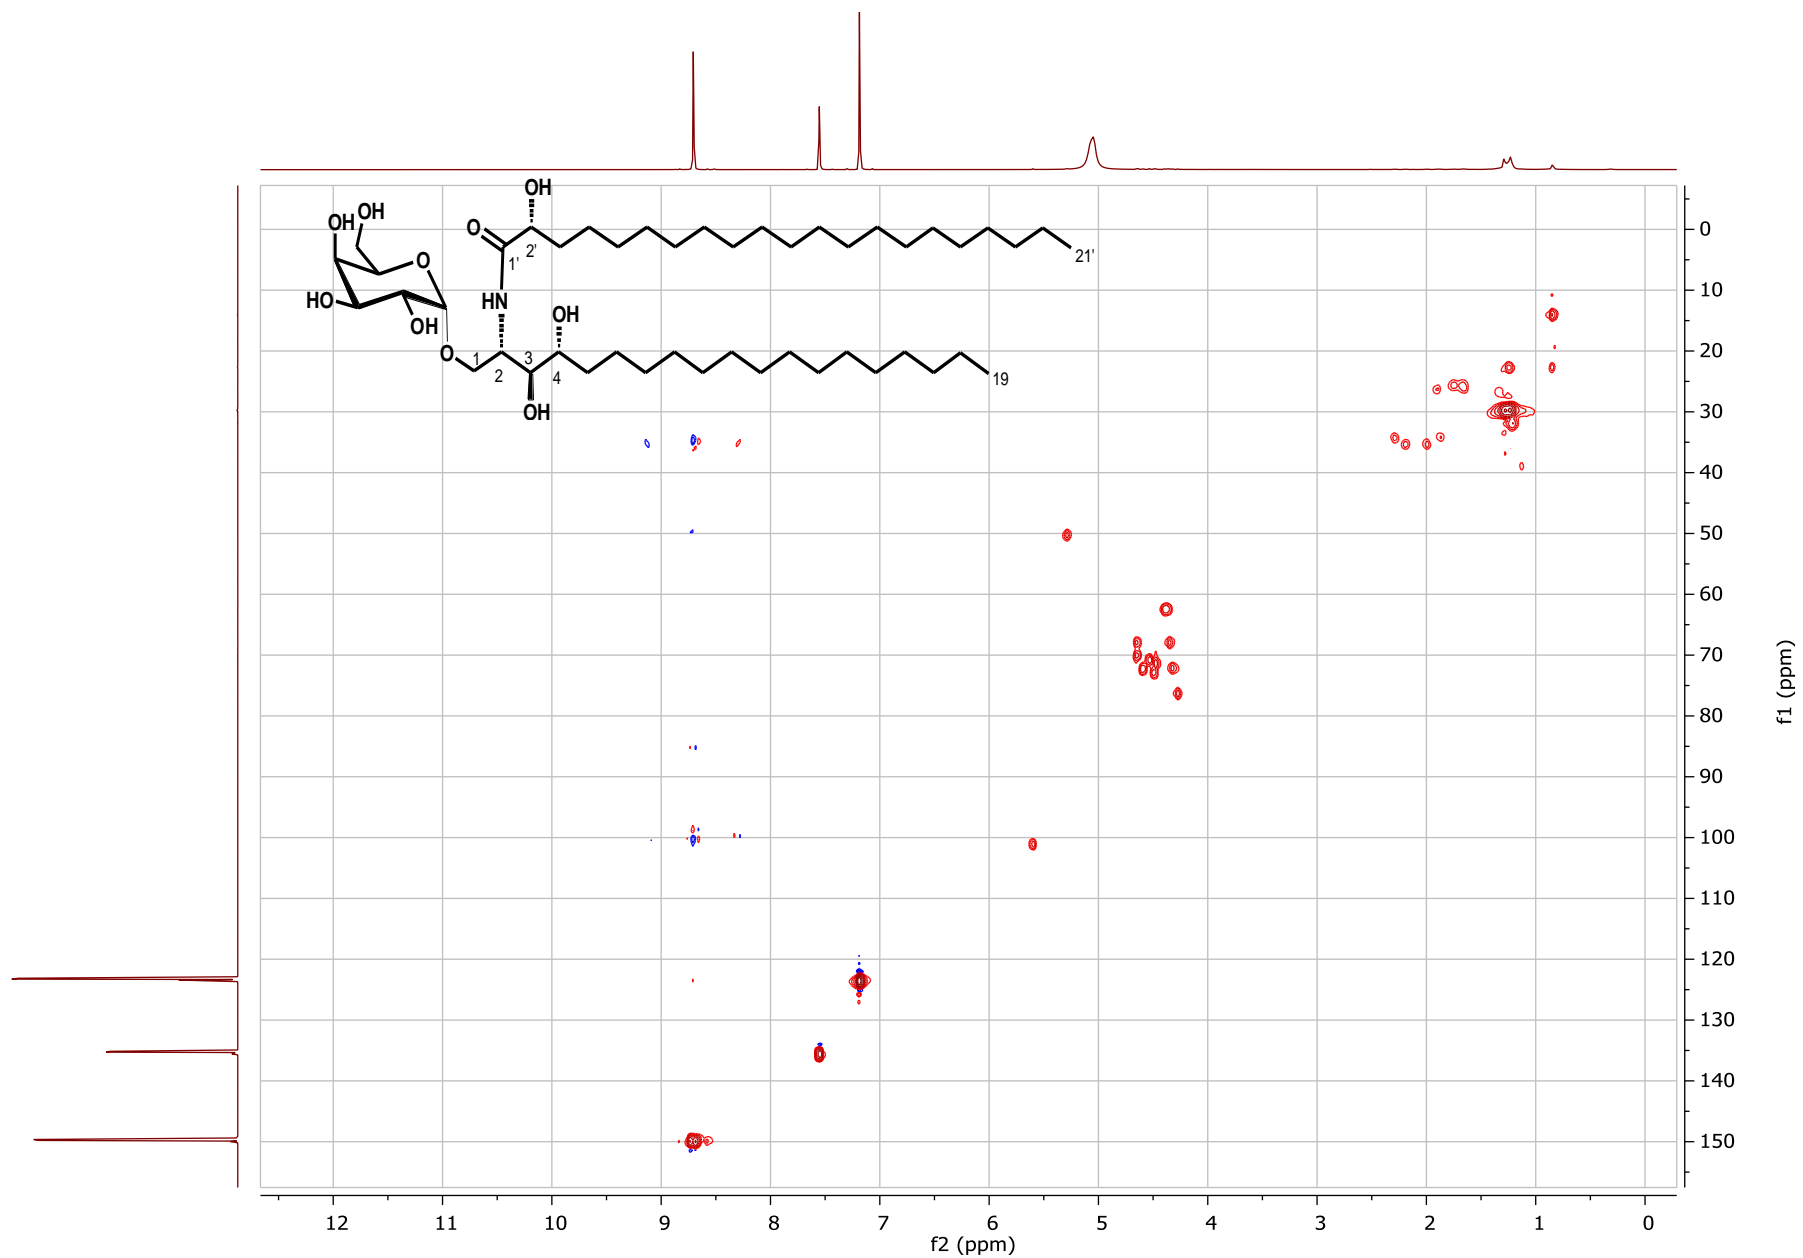

**Figure S21:** 2D-HMBC spectrum of compound **2** in ( $\text{C}_5\text{D}_5\text{N}$ , 400 MHz)
